# Supplementary material for: N,N-Dialkylbenzimidazol-2-ylidene platinum complexes – effects of alkyl residues and ancillarycis-ligands on anticancer activity
Source: Royal Society of Chemistry journal article supplement (doi:10.1039/c8dt03360a), 2018-01-01
Supplement: c8dt03360a1.pdf [file c8dt03360a1.pdf]

## Electronic Supporting Information

# *N,N*-Dialkylbenzimidazol-2-ylidene platinum complexes – effects of alkyl residues and ancillary *cis*-ligands on their anticancer activity

Tobias Rehm,<sup>a</sup> Matthias Rothemund,<sup>a</sup> Alexander Bär,<sup>a</sup> Thomas Dietel,<sup>b</sup> Rhett Kempe,<sup>b</sup> Hana Kostrhunova,<sup>c</sup>  
Viktor Brabec,<sup>c</sup> Jana Kasparkova,<sup>\*c</sup> and Rainer Schobert<sup>\*a</sup>

<sup>a</sup>Organic Chemistry Laboratory, University Bayreuth, Universitaetsstrasse 30, 95440 Bayreuth, Germany.

E-mail: Rainer.Schobert@uni-bayreuth.de

<sup>b</sup> Lehrstuhl fuer Anorganische Chemie II, University Bayreuth, Universitaetsstrasse 30, 95440 Bayreuth, Germany.

<sup>c</sup> Institute of Biophysics, Academy of Sciences of the Czech Republic, CZ-61265 Brno, Czech Republic.

E-mail: jana@ibp.cz

### Table of content:

|                                                                                                                                          |     |
|------------------------------------------------------------------------------------------------------------------------------------------|-----|
| General information                                                                                                                      | S1  |
| Synthesis and characterization of benzimidazolium chlorides                                                                              | S2  |
| X-ray structural data of complexes <b>8b</b> , <b>9c</b> and <b>10a</b> (Table S1)                                                       | S3  |
| NMR spectra of complexes <b>8a-d</b> , <b>9a-d</b> and <b>10a-c</b> (Fig. S1-S40)                                                        | S4  |
| Values of cellular accumulation of complexes <b>8c</b> , <b>9a-d</b> , <b>10c</b> and <b>CDDP</b> (Table S2)                             | S25 |
| Sequence preferences of complexes <b>8c</b> , <b>9c</b> and <b>10a-c</b> (Table S3)                                                      | S25 |
| Influence of complexes <b>8c</b> , <b>9c</b> , <b>10a-c</b> and <b>CDDP</b> on the melting point of ct DNA (Fig. S41)                    | S25 |
| Influence of complexes <b>8c</b> , <b>9c</b> , <b>10a-c</b> and <b>CDDP</b> on the relative Tb <sup>3+</sup> ion fluorescence (Fig. S42) | S26 |
| Unwinding of negatively supercoiled pSP73 plasmid DNA by <b>8c</b> , <b>9c</b> , <b>10a-c</b> and <b>CDDP</b> (Fig. S43)                 | S26 |
| Cell cycle analysis of complexes <b>8c</b> , <b>9c</b> and <b>10c</b> in HCT116 <sup>-/-</sup> cells (Fig. S44)                          | S27 |
| References                                                                                                                               | S27 |

---

\*shared corresponding authors.

## General information

All the chemicals and reagents were purchased from Sigma Aldrich, Alfa Aesar, ChemPur or ABCR and were used without further purification. Melting points are uncorrected; NMR spectra were run on a 500 MHz spectrometer; chemical shifts are given in ppm ( $\delta$ ) and referenced relative to the internal solvent signal;  $^{195}\text{Pt}$  NMR shifts are quoted relative to  $\Xi(^{195}\text{Pt}) = 21.496784$  MHz,  $\text{K}_2\text{PtCl}_4$  was used as external standard ( $\delta = -1612.81$ ); mass spectra: direct inlet, EI, 70 eV; elemental analyses: Vario EL III elemental analyser; X-Ray Diffractometer: STOE-IPDS II. Synthesis of benzimidazolium salts was performed based on literature procedures<sup>1-3</sup> as described herein.

## Synthesis and characterization of benzimidazolium chlorides 6

### General procedure:

Benzimidazole (1eq) and the respective alkyl iodides or bromides (5 - 10 eq) in acetonitrile (10 mL/mmol) were treated with  $\text{K}_2\text{CO}_3$  (1.5 eq) and the mixture was heated to 50 - 70 °C for 1-5 days. After filtration the solvent was evaporated in vacuo and the residue was crystalized from  $\text{CH}_2\text{Cl}_2$  and hexane.

The resulting benzimidazolium iodides/bromides were then stirred with  $\text{Ag}_2\text{CO}_3$  (1eq) and conc.  $\text{HNO}_3$  (kat.) in Ethanol for 3 h and after filtration of the silver halides the solution was treated with conc. HCl to obtain the respective benzimidazolium chlorides. After neutralization with  $\text{NaHCO}_3$  and further filtration the solvent was evaporated, and the solids were resuspended in  $\text{CH}_2\text{Cl}_2$  to filter off all inorganic residues. The product was then crystalized by adding hexane.

### Synthesis of 1,3-dimethylbenzimidazolium chloride:<sup>1</sup>

Benzimidazole (472 mg, 4.0 mmol), iodomethane (2.48 mL, 40 mmol, 10 eq) and  $\text{K}_2\text{CO}_3$  (828 mg, 6.0 mmol, 1.5 eq) in acetonitrile (40 mL) for 5 d at 50 °C gave 1.004 g (92 %) of the benzimidazolium iodide which was treated with  $\text{Ag}_2\text{CO}_3$  (1.0 g, 3.7 mmol), conc.  $\text{HNO}_3$  (100  $\mu\text{L}$ ) and conc. HCl (800  $\mu\text{L}$ ) in EtOH (80 mL). Yield: 632 mg (87 %) white solid;  $^1\text{H}$  NMR ( $\text{CDCl}_3$ , 500 MHz):  $\delta$  4.21 (6 H, s) 7.67 - 7.71 (2 H, m) 7.71 - 7.76 (2 H, m) 10.75 (1 H, s).

### Synthesis of 1,3-diethylbenzimidazolium chloride:<sup>1</sup>

Benzimidazole (500 mg, 4.2 mmol), iodoethane (1.26 mL, 21 mmol, 5 eq) and  $\text{K}_2\text{CO}_3$  (871 mg, 6.3 mmol, 1.5 eq) in acetonitrile (40 mL) for 24 h at 70 °C gave 1.278 g (100 %) of the benzimidazolium iodide which was treated with  $\text{Ag}_2\text{CO}_3$  (1.16 g, 4.2 mmol), conc.  $\text{HNO}_3$  (100  $\mu\text{L}$ ) and conc. HCl (800  $\mu\text{L}$ ) in EtOH (80 mL). Yield: 880 mg (100 %) white solid;  $^1\text{H}$  NMR ( $\text{CDCl}_3$ , 500 MHz):  $\delta$  1.77 (6 H, t,  $J = 7.3$  Hz) 4.70 (4 H, q,  $J = 7.3$  Hz) 7.66 - 7.70 (2 H, m) 7.75 - 7.79 (2 H, m) 11.08 (1 H, s).

### Synthesis of 1,3-dibutylbenzimidazolium chloride:<sup>2</sup>

Benzimidazole (2.0 g, 17 mmol), 1-bromobutane (7.2 mL, 68 mmol, 4 eq) and  $\text{K}_2\text{CO}_3$  (3.5 g, 26 mmol, 1.5 eq) in acetonitrile (150 mL) for 5 d at 70 °C gave 3.635 g (69 %) of the benzimidazolium bromide which was treated with  $\text{Ag}_2\text{CO}_3$  (3.22 g, 12 mmol), conc.  $\text{HNO}_3$  (100  $\mu\text{L}$ ) and conc. HCl (800  $\mu\text{L}$ ) in EtOH (100 mL). Yield: 2.849 mg (63 %) amber solid;  $^1\text{H}$  NMR ( $\text{CDCl}_3$ , 500 MHz):  $\delta$  0.98 (6 H, t,  $J = 7.5$  Hz) 1.44 (4 H, sxt,  $J = 7.5$  Hz) 2.02 (4 H, quin,  $J = 7.5$  Hz) 4.59 (4 H, t,  $J = 7.5$  Hz) 7.64 - 7.68 (2 H, m) 7.70 - 7.74 (2 H, m) 11.46 (1 H, s).

### Synthesis of 1,3-dioctylbenzimidazolium chloride:<sup>3</sup>

Benzimidazole (236 mg, 2.0 mmol), 1-bromooctane (1.74 mL, 10 mmol, 5 eq) and K<sub>2</sub>CO<sub>3</sub> (414 mg, 3.0 mmol, 1.5 eq) in acetonitrile (20 mL) for 3 d at 70 °C gave 461 mg (54 %) of the benzimidazolium bromide which was treated with Ag<sub>2</sub>CO<sub>3</sub> (300 mg, 1.1 mmol), conc. HNO<sub>3</sub> (30 µL) and conc. HCl (200 µL) in EtOH (20 mL). Yield: 398 mg (52 %) white solid; <sup>1</sup>H NMR (CDCl<sub>3</sub>, 500 MHz): δ 0.84 - 0.89 (6 H, m) 1.20 - 1.40 (20 H, m) 2.01 (4 H, quin, *J* = 7.5 Hz) 4.54 (4 H, t, *J* = 7.5 Hz) 7.64 - 7.69 (2 H, m) 7.69 - 7.75 (2 H, m) 11.05 (1 H, s).

**Table S 1:** X-ray structural data of platinum carbene complexes 8b, 9c and 10a.

| Crystal data                                                                       | 8b                                                                  | 9c                                                                 | 10a                                                                   |
|------------------------------------------------------------------------------------|---------------------------------------------------------------------|--------------------------------------------------------------------|-----------------------------------------------------------------------|
| Chemical formula                                                                   | C <sub>13</sub> H <sub>20</sub> Cl <sub>2</sub> N <sub>2</sub> OPtS | C <sub>33</sub> H <sub>37</sub> Cl <sub>2</sub> N <sub>2</sub> PPt | C <sub>45</sub> H <sub>40</sub> ClN <sub>2</sub> P <sub>2</sub> Pt·Cl |
| <i>M<sub>r</sub></i>                                                               | 518.36                                                              | 1517.27                                                            | 936.72                                                                |
| Crystal system, space group                                                        | Triclinic, <i>P</i> <sup>1</sup>                                    | Triclinic, <i>P</i> <sup>1</sup>                                   | Monoclinic, <i>P</i> 21/ <i>c</i>                                     |
| Temperature (K)                                                                    | 133                                                                 | 133                                                                | 133                                                                   |
| <i>a</i> , <i>b</i> , <i>c</i> (Å)                                                 | 8.675 (5), 9.264 (5), 10.601 (5)                                    | 9.1067 (18), 12.792 (3), 13.803 (3)                                | 12.578 (5), 10.790 (5), 32.126 (5)                                    |
| α, β, γ (°)                                                                        | 91.874 (5), 103.182 (5), 94.722 (5)                                 | 88.02 (3), 87.59 (3), 71.06 (3)                                    | 90, 94.531 (5), 90                                                    |
| <i>V</i> (Å <sup>3</sup> )                                                         | 825.5 (8)                                                           | 1519.2 (6)                                                         | 4346 (3)                                                              |
| <i>Z</i>                                                                           | 2                                                                   | 1                                                                  | 4                                                                     |
| <i>F</i> (000)                                                                     | 496                                                                 | 752                                                                | 1864                                                                  |
| <i>D<sub>x</sub></i> (Mg m <sup>-3</sup> )                                         | 2085                                                                | 1.658                                                              | 1431                                                                  |
| Radiation type                                                                     | Mo <i>K</i> α                                                       | Mo <i>K</i> α                                                      | Mo <i>K</i> α                                                         |
| No. of reflections for cell measurement                                            | 9824                                                                | 31963                                                              | 16101                                                                 |
| θ range (°) for cell measurement                                                   | 2.0–28.5                                                            | 1.5–30.1                                                           | 1.6–27.7                                                              |
| μ (mm <sup>-1</sup> )                                                              | 8.95                                                                | 4.87                                                               | 3.46                                                                  |
| Crystal shape                                                                      | Needles                                                             | Block                                                              | Platte                                                                |
| Colour                                                                             | Colourless                                                          | Colourless                                                         | Colourless                                                            |
| Crystal size (mm)                                                                  | 0.11 × 0.08 × 0.07                                                  | 0.36 × 0.19 × 0.15                                                 | 0.20 × 0.09 × 0.08                                                    |
| <b>Data collection</b>                                                             |                                                                     |                                                                    |                                                                       |
| Diffractometer                                                                     | STOE-STADIVARI                                                      | STOE-STADIVARI                                                     | STOE-STADIVARI                                                        |
| Scan method                                                                        | ω-scan                                                              | ω-scan                                                             | ω-scan                                                                |
| Absorption correction                                                              | Numerical                                                           | Numerical                                                          | Numerical                                                             |
|                                                                                    | STOE <i>X-RED32</i>                                                 | STOE <i>X-RED32</i>                                                | SROE <i>X-RED32</i>                                                   |
| <i>T<sub>min</sub></i> , <i>T<sub>max</sub></i>                                    | 0.680, 0.761                                                        | 0.553, 0.719                                                       | 0.863, 0.953                                                          |
| No. of measured, independent and observed [ <i>I</i> > 2σ( <i>I</i> )] reflections | 7449, 3177, 2704                                                    | 21191, 5907, 5605                                                  | 32457, 8450, 5359                                                     |
| <i>R<sub>int</sub></i>                                                             | 0.042                                                               | 0.022                                                              | 0.104                                                                 |
| θ values (°)                                                                       | θ <sub>max</sub> = 26.0, θ <sub>min</sub> = 2.0                     | θ <sub>max</sub> = 26.0, θ <sub>min</sub> = 1.5                    | θ <sub>max</sub> = 26.0, θ <sub>min</sub> = 1.6                       |
| (sin θ/λ) <sub>max</sub> (Å <sup>-1</sup> )                                        | 0.617                                                               | 0.617                                                              | 0.617                                                                 |
| Range of <i>h</i> , <i>k</i> , <i>l</i>                                            | <i>h</i> = -9 → 10<br><i>k</i> = -11 → 9<br><i>l</i> = -13 → 11     | <i>h</i> = -5 → 11<br><i>k</i> = -15 → 15<br><i>l</i> = -16 → 17   | <i>h</i> = -15 → 8<br><i>k</i> = -13 → 13<br><i>l</i> = -39 → 37      |
| <b>Refinement</b>                                                                  |                                                                     |                                                                    |                                                                       |
| Refinement on                                                                      | <i>F</i> <sup>2</sup>                                               | <i>F</i> <sup>2</sup>                                              | <i>F</i> <sup>2</sup>                                                 |

|                                                               |                                                                           |                                                                                     |                                                                           |
|---------------------------------------------------------------|---------------------------------------------------------------------------|-------------------------------------------------------------------------------------|---------------------------------------------------------------------------|
| $R[F^2 > 2\sigma(F^2)], wR(F^2), S$                           | 0.033, 0.085, 1.03                                                        | 0.017, 0.040, 1.04                                                                  | 0.072, 0.190, 0.95                                                        |
| No. of reflections                                            | 3177                                                                      | 5907                                                                                | 8450                                                                      |
| No. of parameters                                             | 185                                                                       | 354                                                                                 | 471                                                                       |
| No. of restraints                                             | 0                                                                         | 0                                                                                   | 27                                                                        |
| H-atom treatment                                              | H-atom parameters constrained                                             | H-atom parameters constrained                                                       | H-atom parameters constrained                                             |
| Weighting scheme                                              | $w = 1/[\sigma^2(F_o^2) + (0.0485P)^2]$<br>where $P = (F_o^2 + 2F_c^2)/3$ | $w = 1/[\sigma^2(F_o^2) + (0.0275P)^2 + 0.1532P]$<br>where $P = (F_o^2 + 2F_c^2)/3$ | $w = 1/[\sigma^2(F_o^2) + (0.1181P)^2]$<br>where $P = (F_o^2 + 2F_c^2)/3$ |
| $(\Delta/\sigma)_{\max}$                                      | < 0.001                                                                   | 0.001                                                                               | 0.001                                                                     |
| $\Delta\rho_{\max}, \Delta\rho_{\min}$ (e $\text{\AA}^{-3}$ ) | 2.52, -2.72                                                               | 0.45, -1.24                                                                         | 1.99, -2.96                                                               |

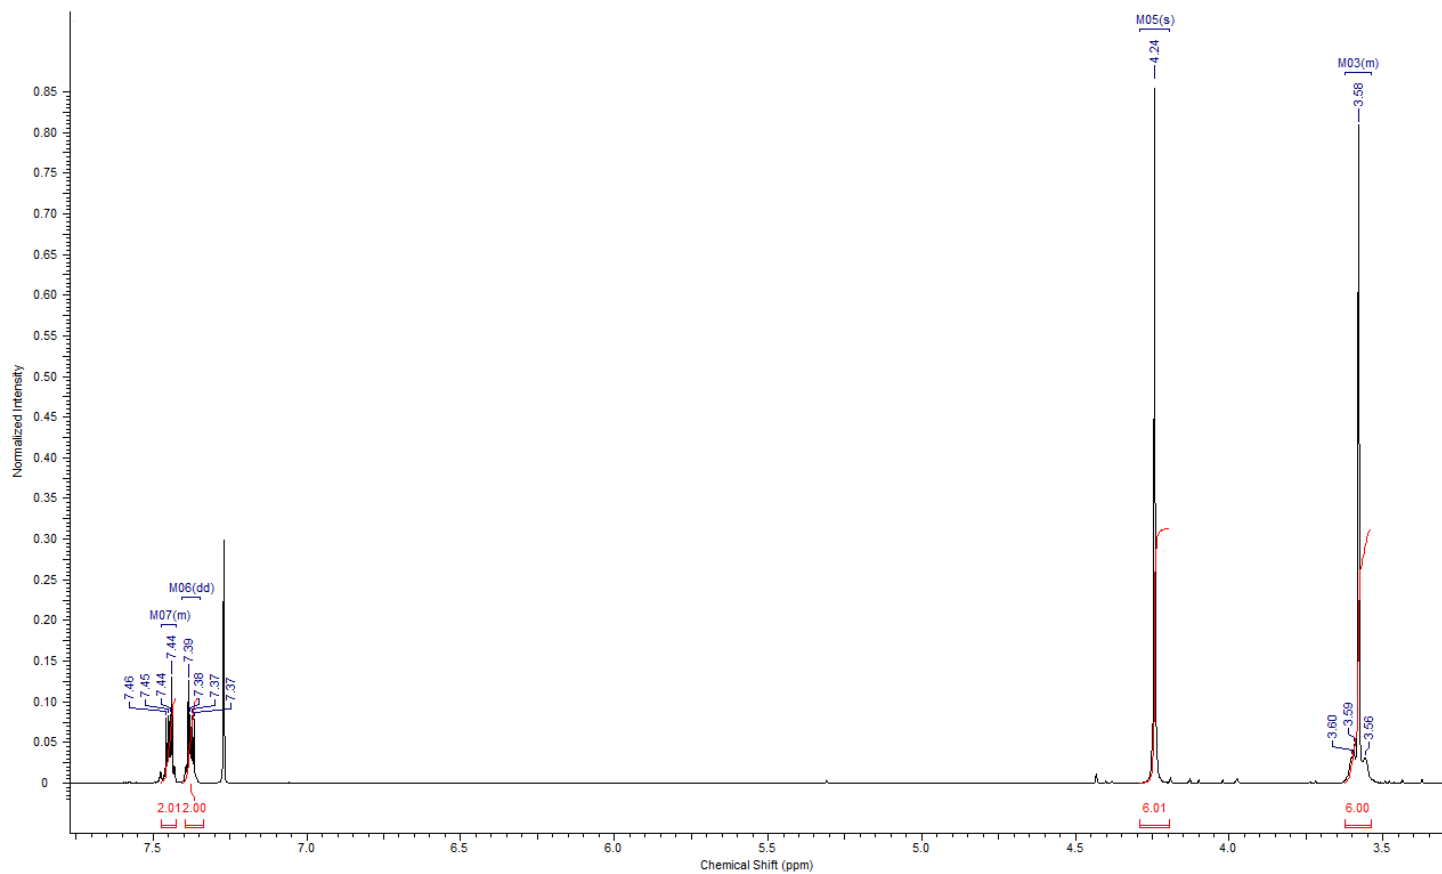

**Fig. S1:**  $^1\text{H-NMR}$  spectrum (500 MHz,  $\text{CDCl}_3$ ) of complex **8a**.

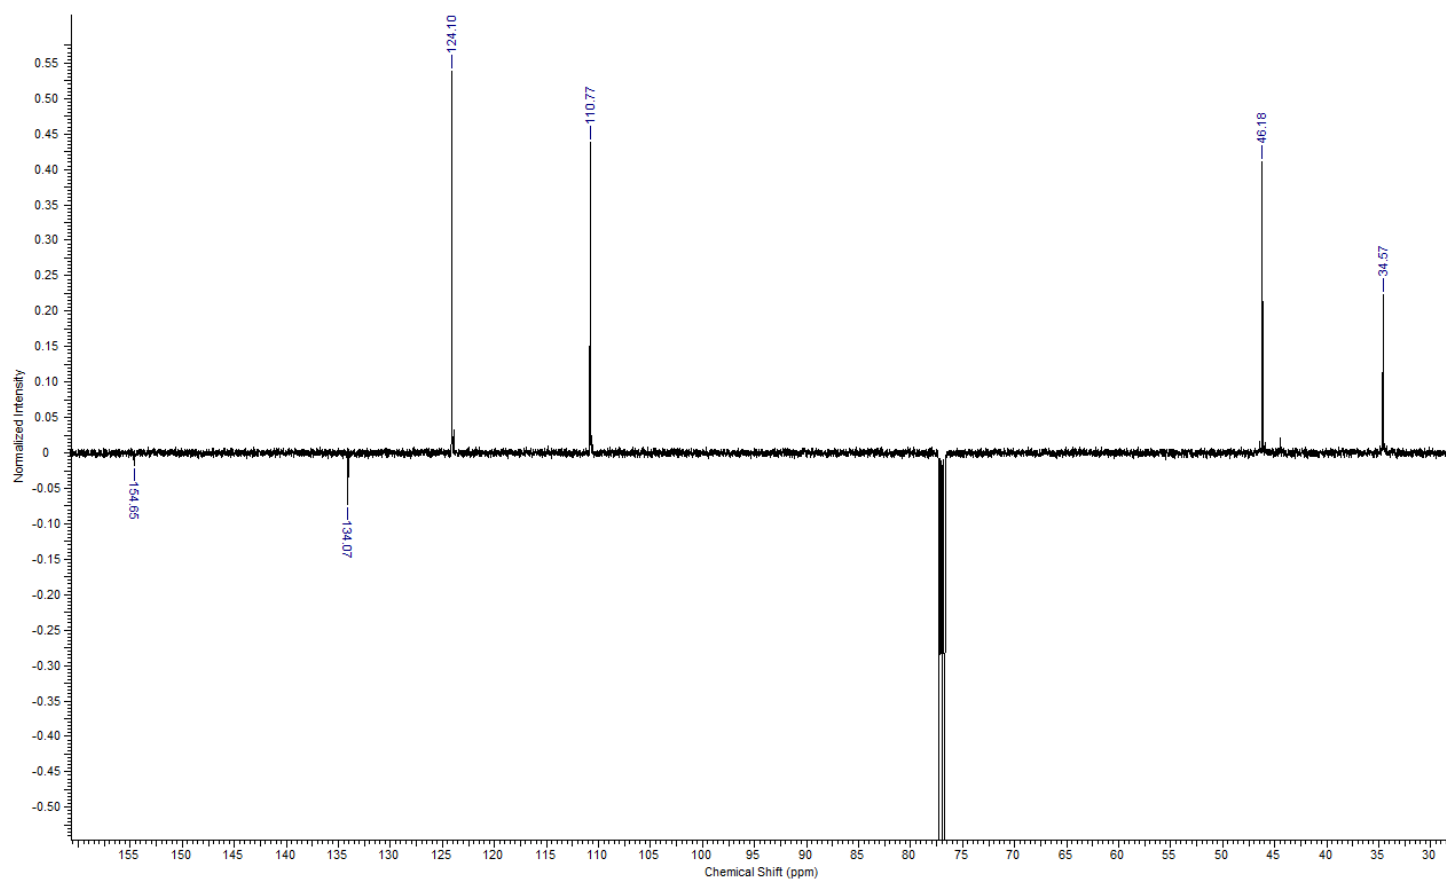

**Fig. S 2:**  $^{13}\text{C}$ -NMR spectrum (126 MHz,  $\text{CDCl}_3$ ) of complex **8a**.

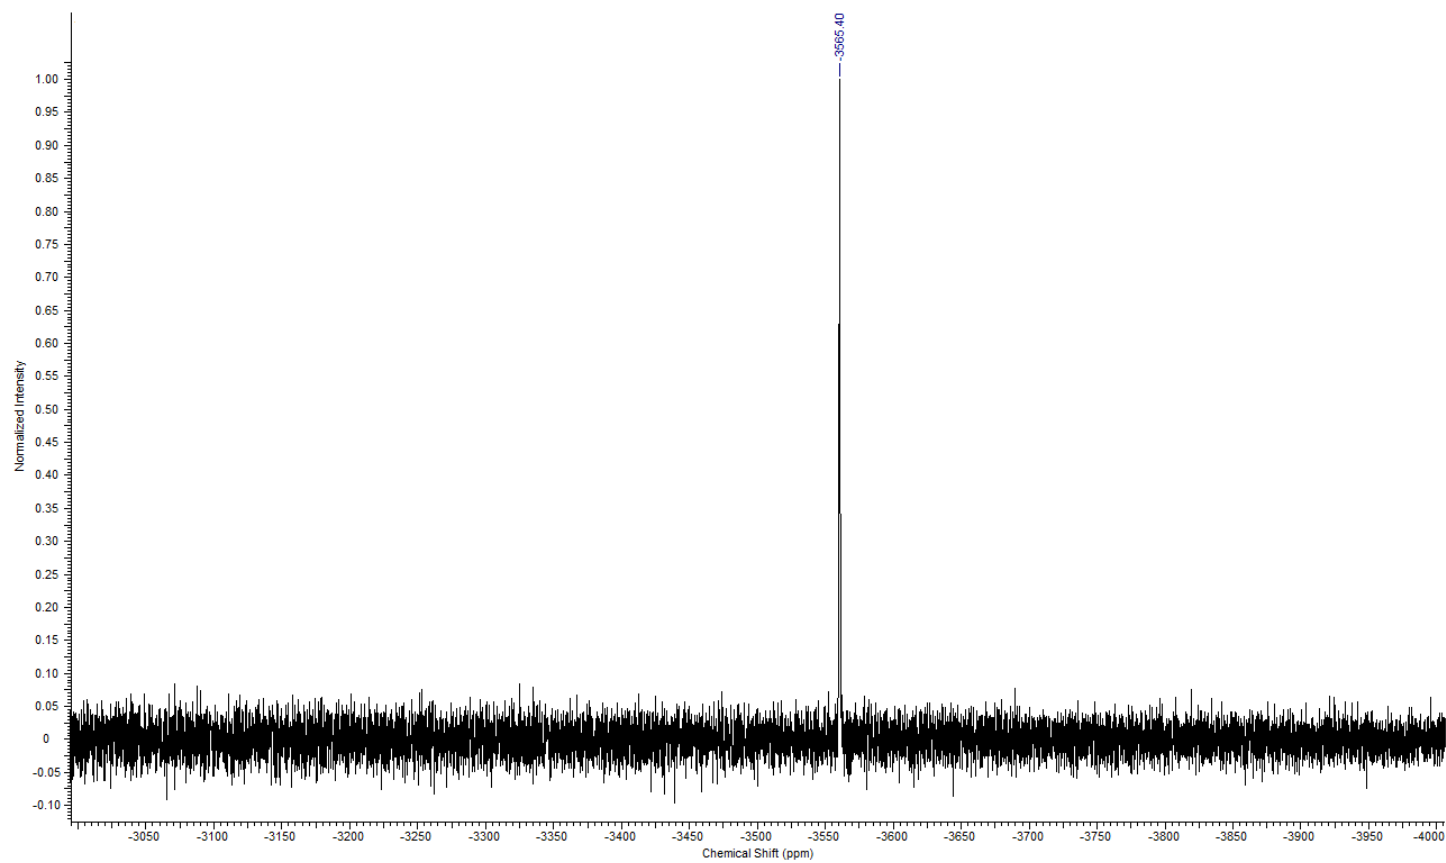

**Fig. S 3:**  $^{195}\text{Pt}$ -NMR spectrum (108 MHz,  $\text{CDCl}_3$ ) of complex **8a**.

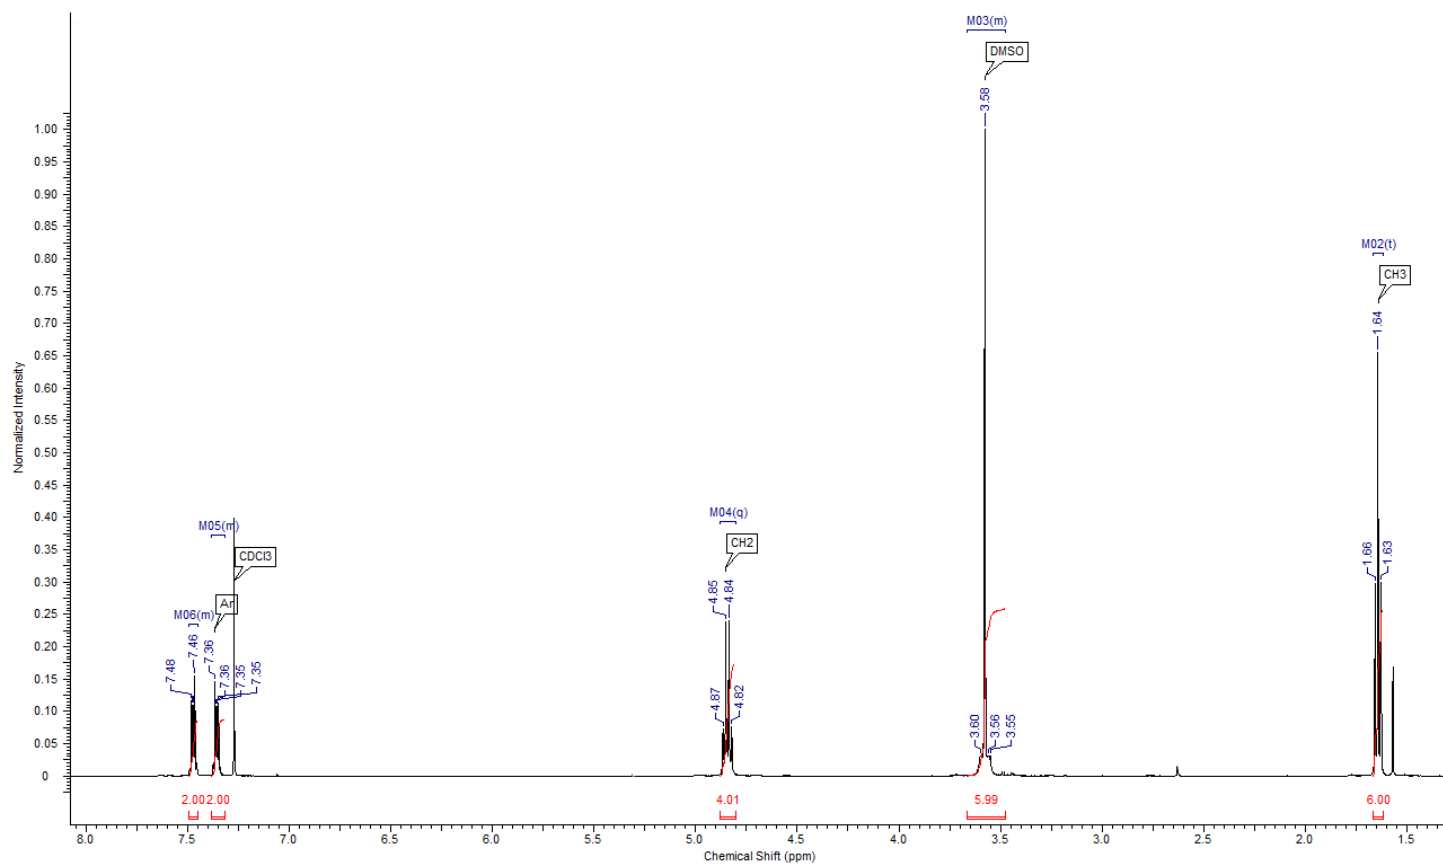

**Fig. S 4:** <sup>1</sup>H-NMR spectrum (500 MHz, CDCl<sub>3</sub>) of complex **8b**.

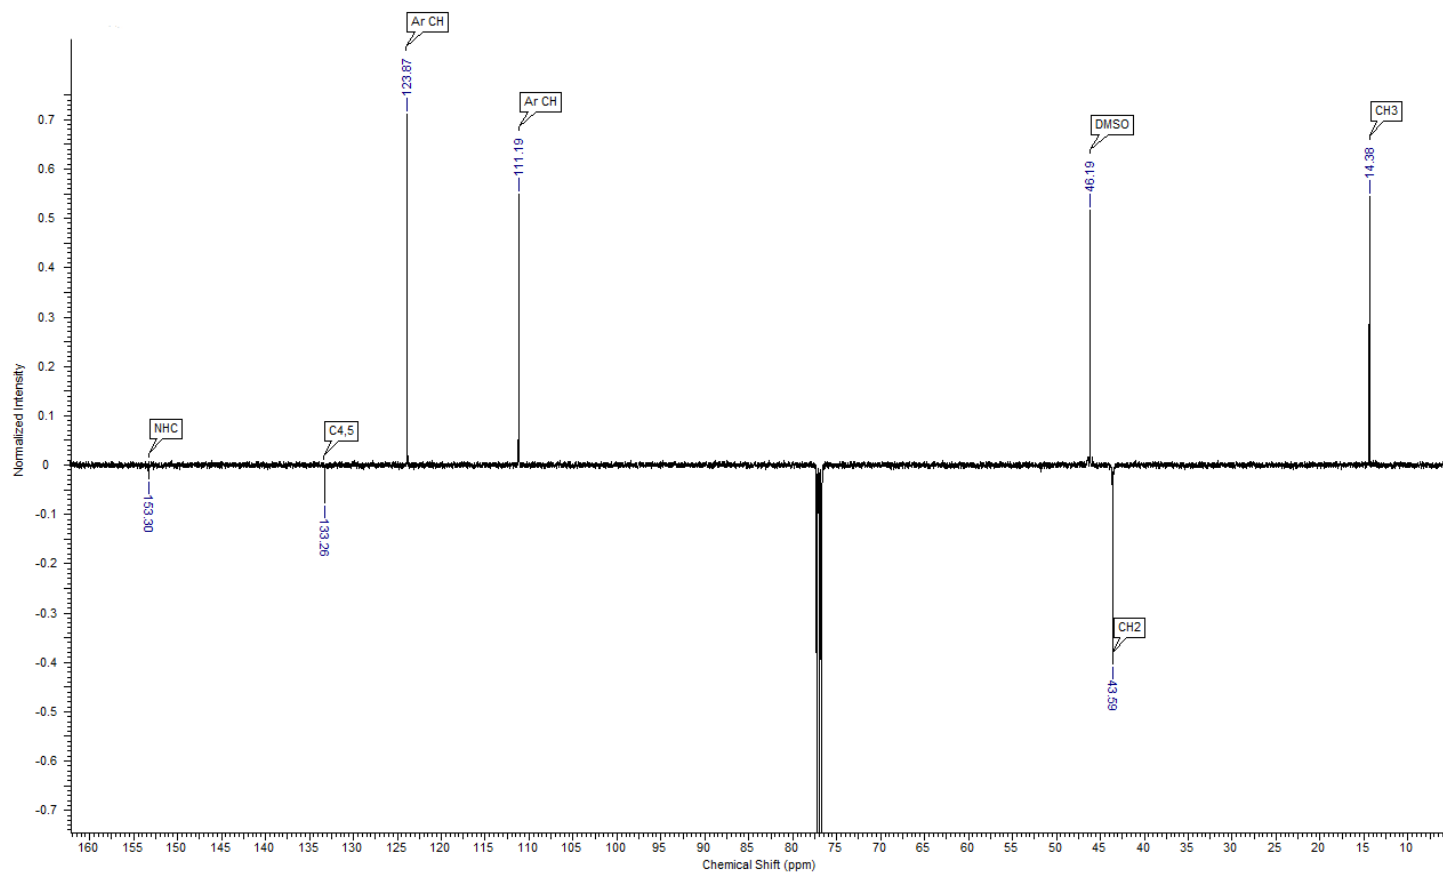

**Fig. S 5:** <sup>13</sup>C-NMR spectrum (126 MHz, CDCl<sub>3</sub>) of complex **8b**.

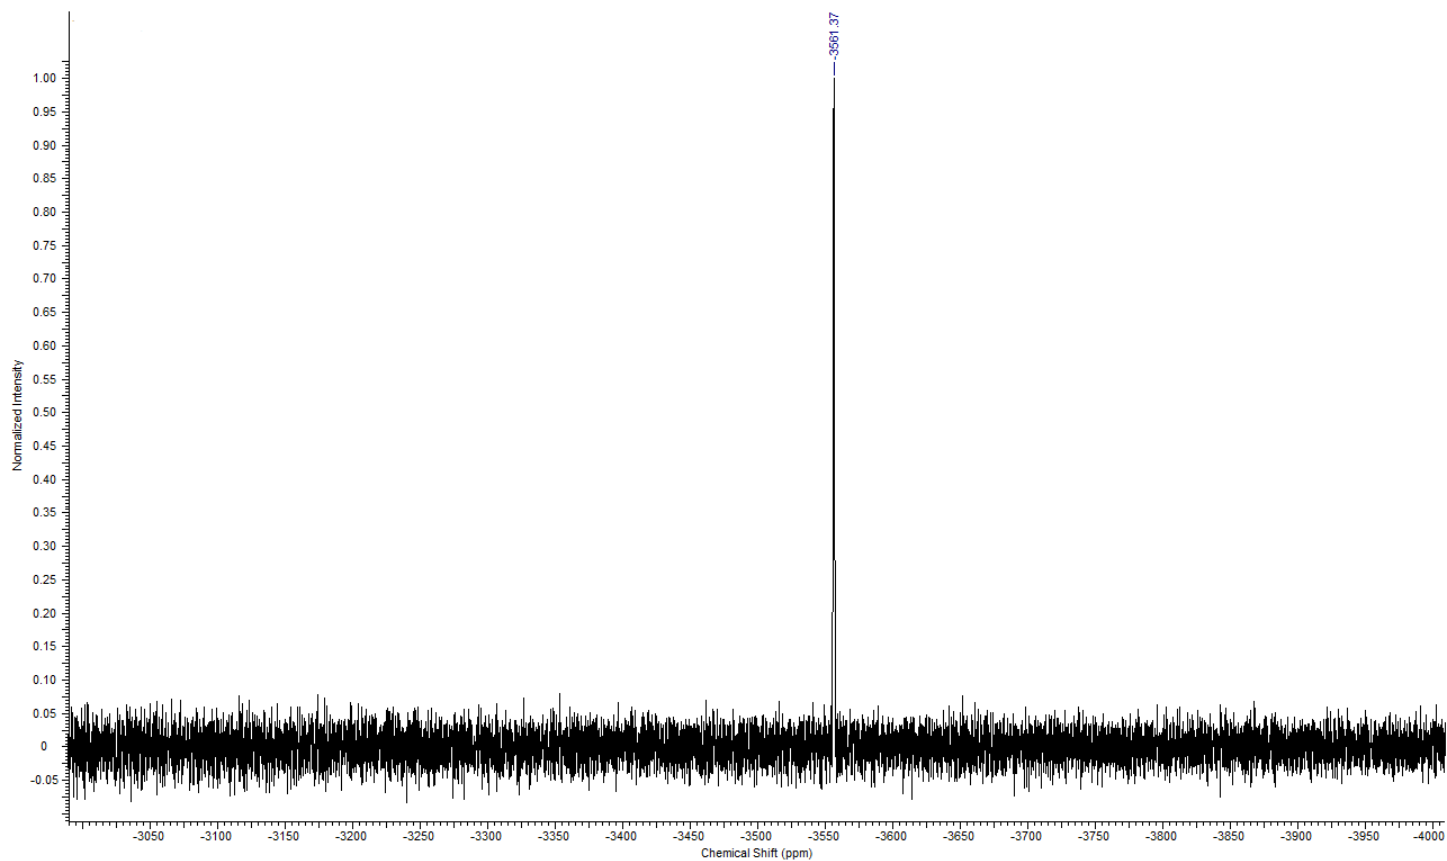

**Fig. S 6:**  $^{195}\text{Pt}$ -NMR spectrum (108 MHz,  $\text{CDCl}_3$ ) of complex **8b**.

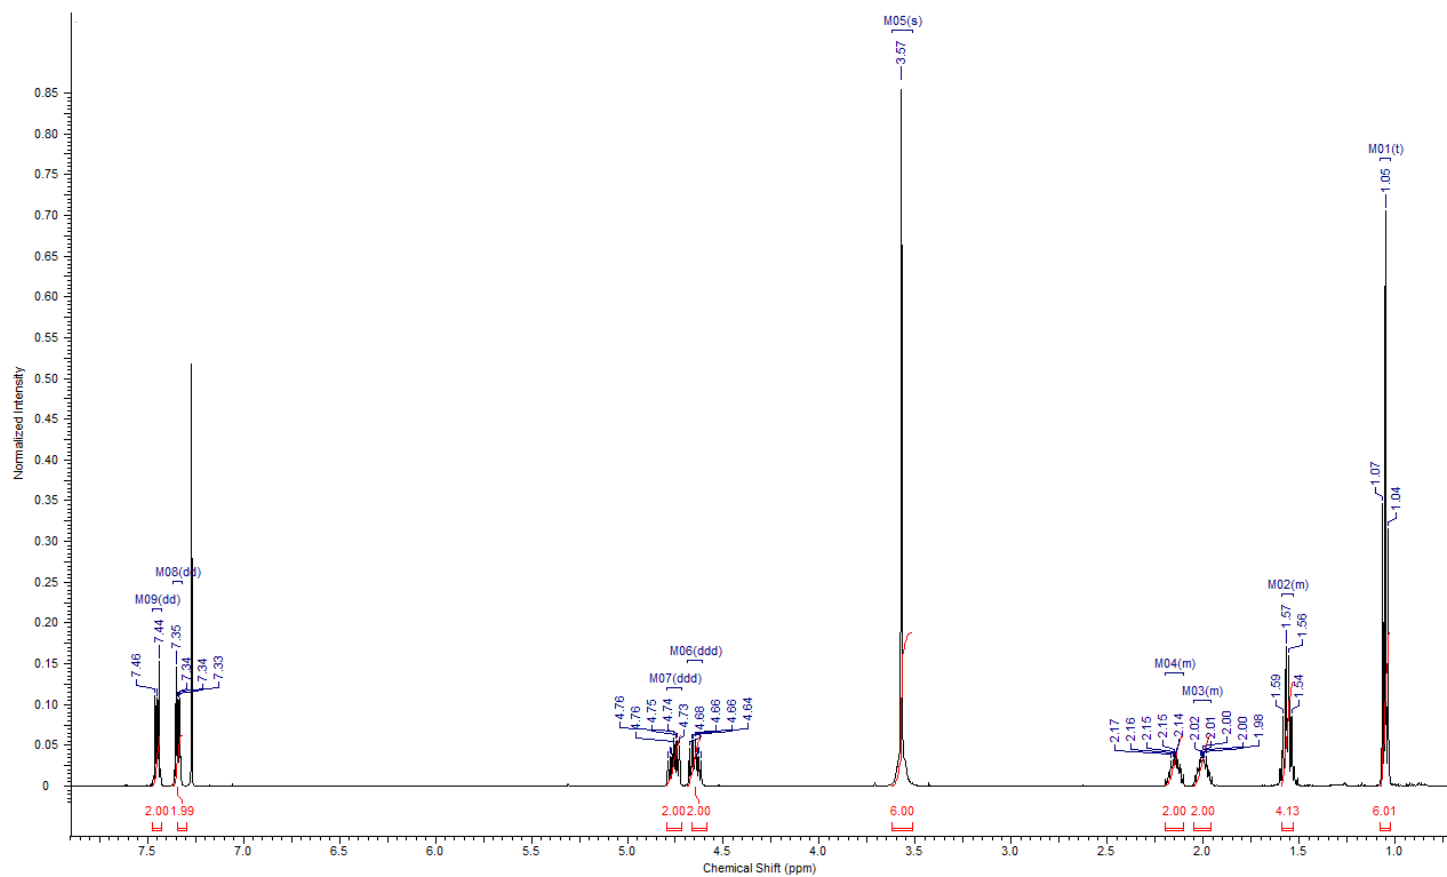

**Fig. S 7:**  $^1\text{H}$ -NMR spectrum (500 MHz,  $\text{CDCl}_3$ ) of complex **8c**.

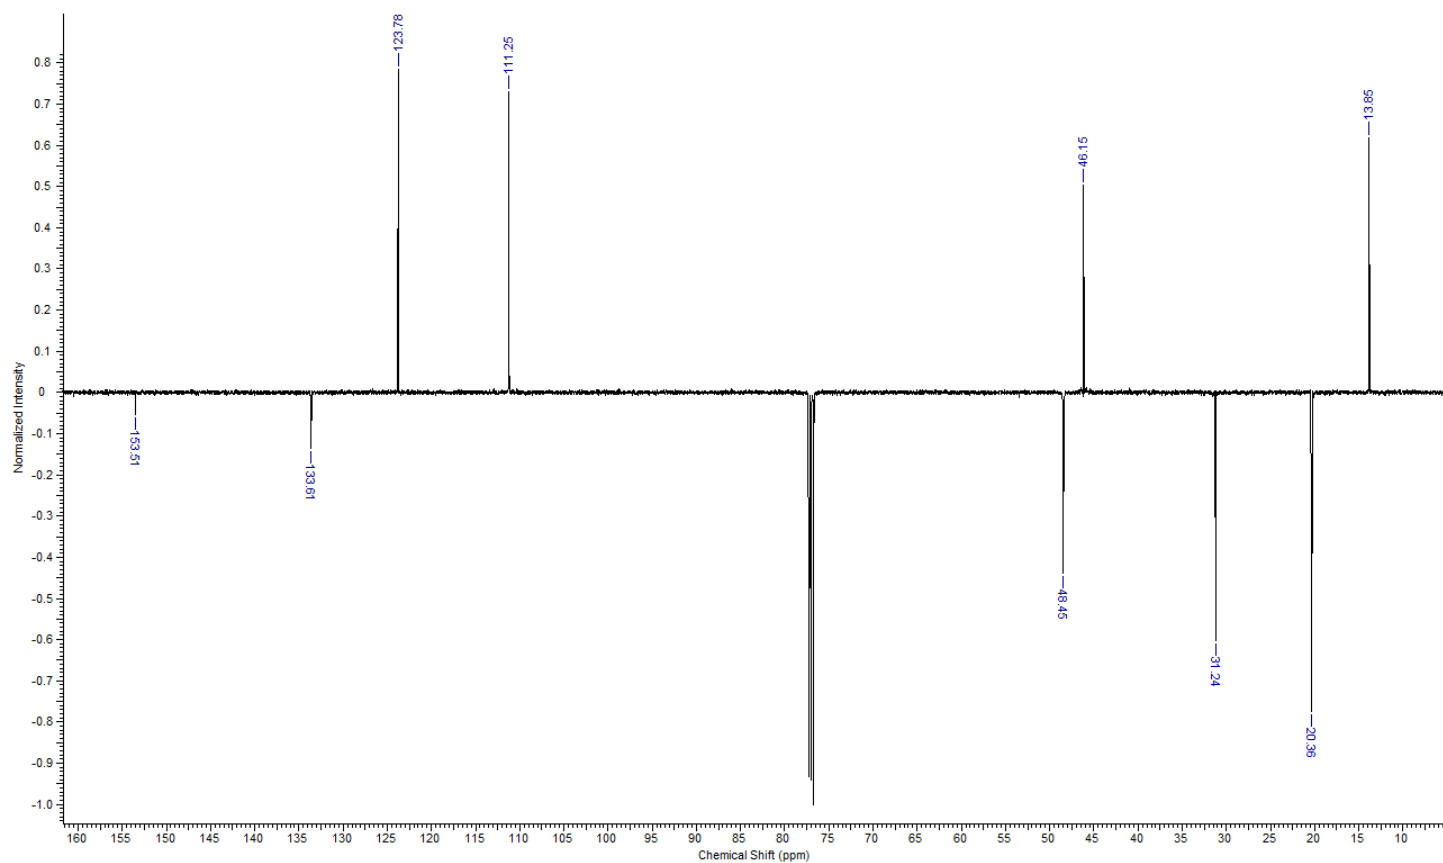

**Fig. S 8:**  $^{13}\text{C}$ -NMR spectrum (126 MHz,  $\text{CDCl}_3$ ) of complex **8c**.

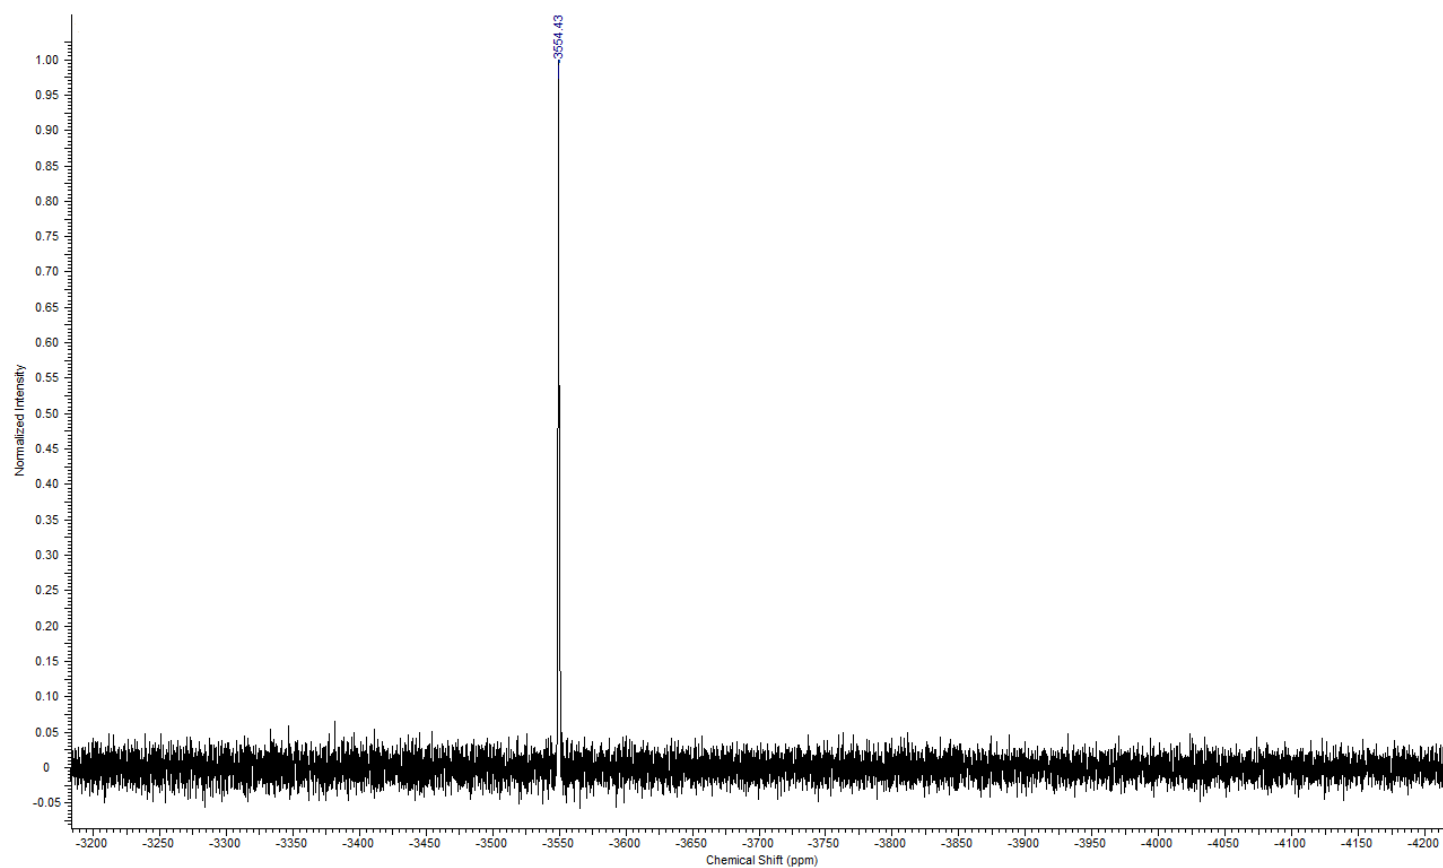

**Fig. S 9:**  $^{195}\text{Pt}$ -NMR spectrum (108 MHz,  $\text{CDCl}_3$ ) of complex **8c**.



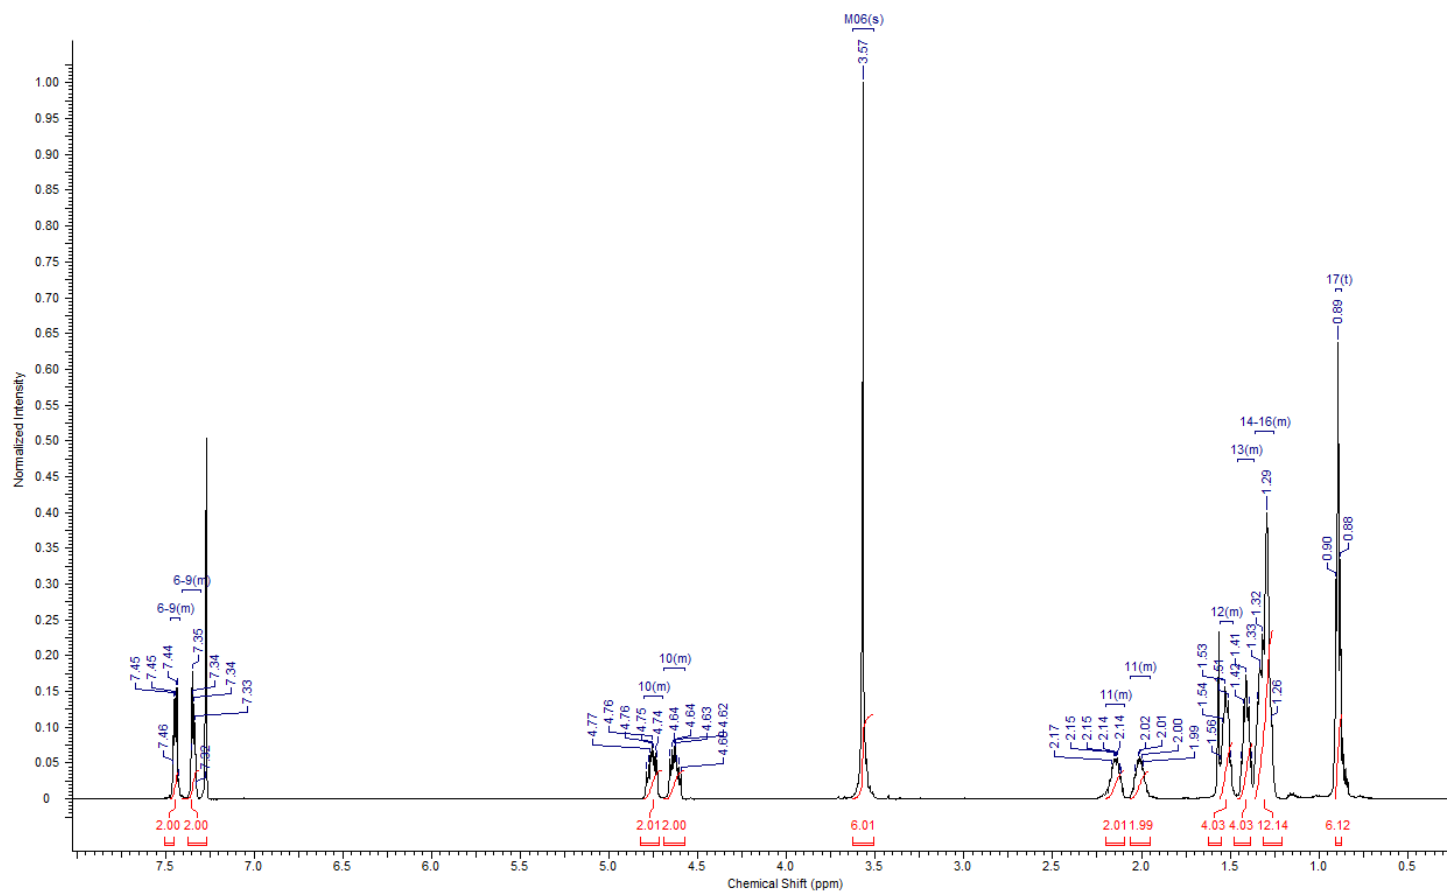

**Fig. S 10:** <sup>1</sup>H-NMR spectrum (500 MHz, CDCl<sub>3</sub>) of complex **8d**.

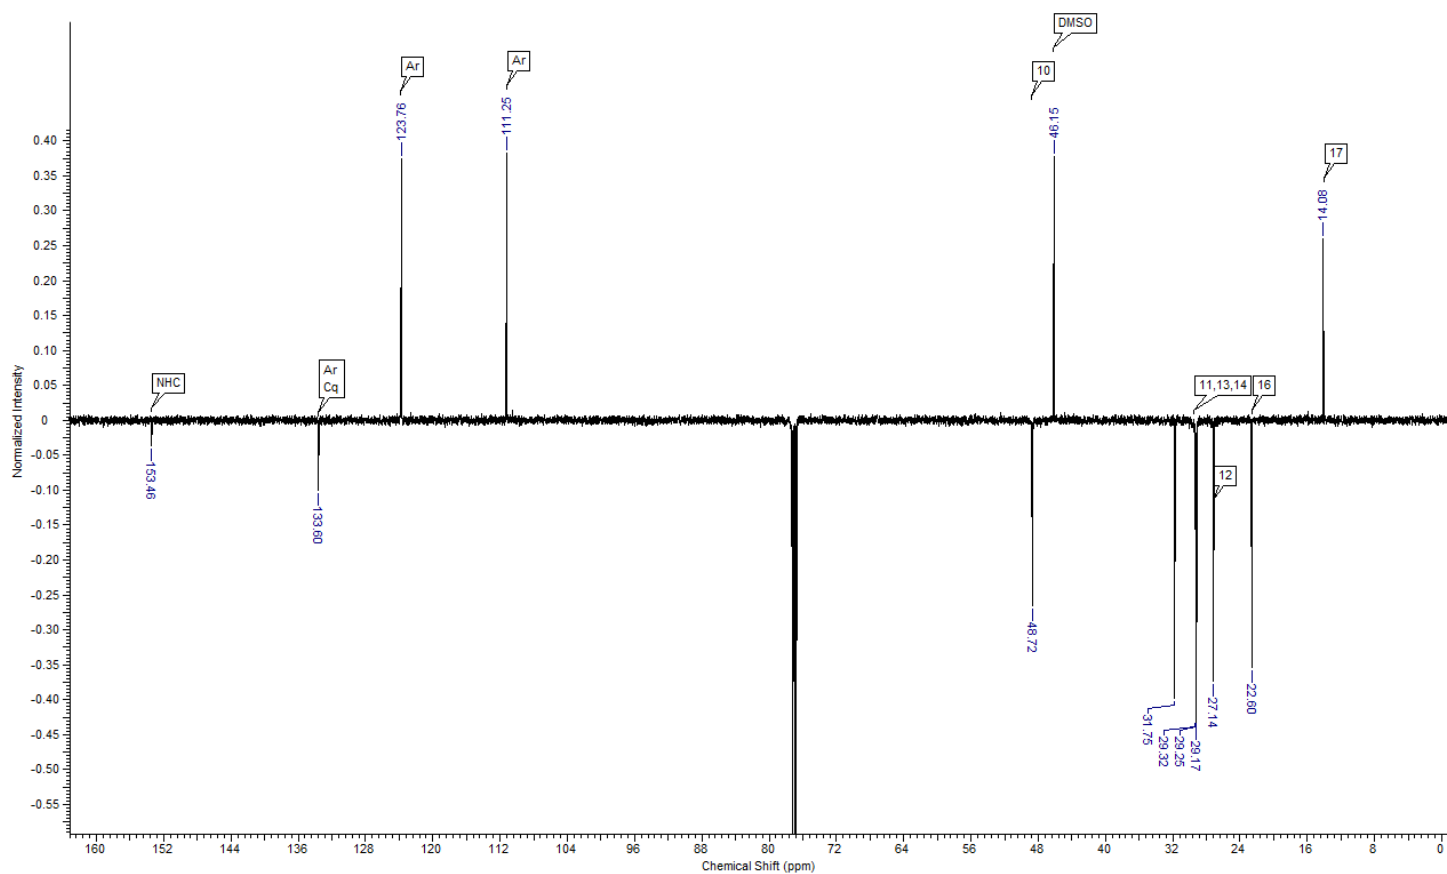

Fig. S 11:  $^{13}\text{C}$ -NMR spectrum (126 MHz,  $\text{CDCl}_3$ ) of complex **8d**.

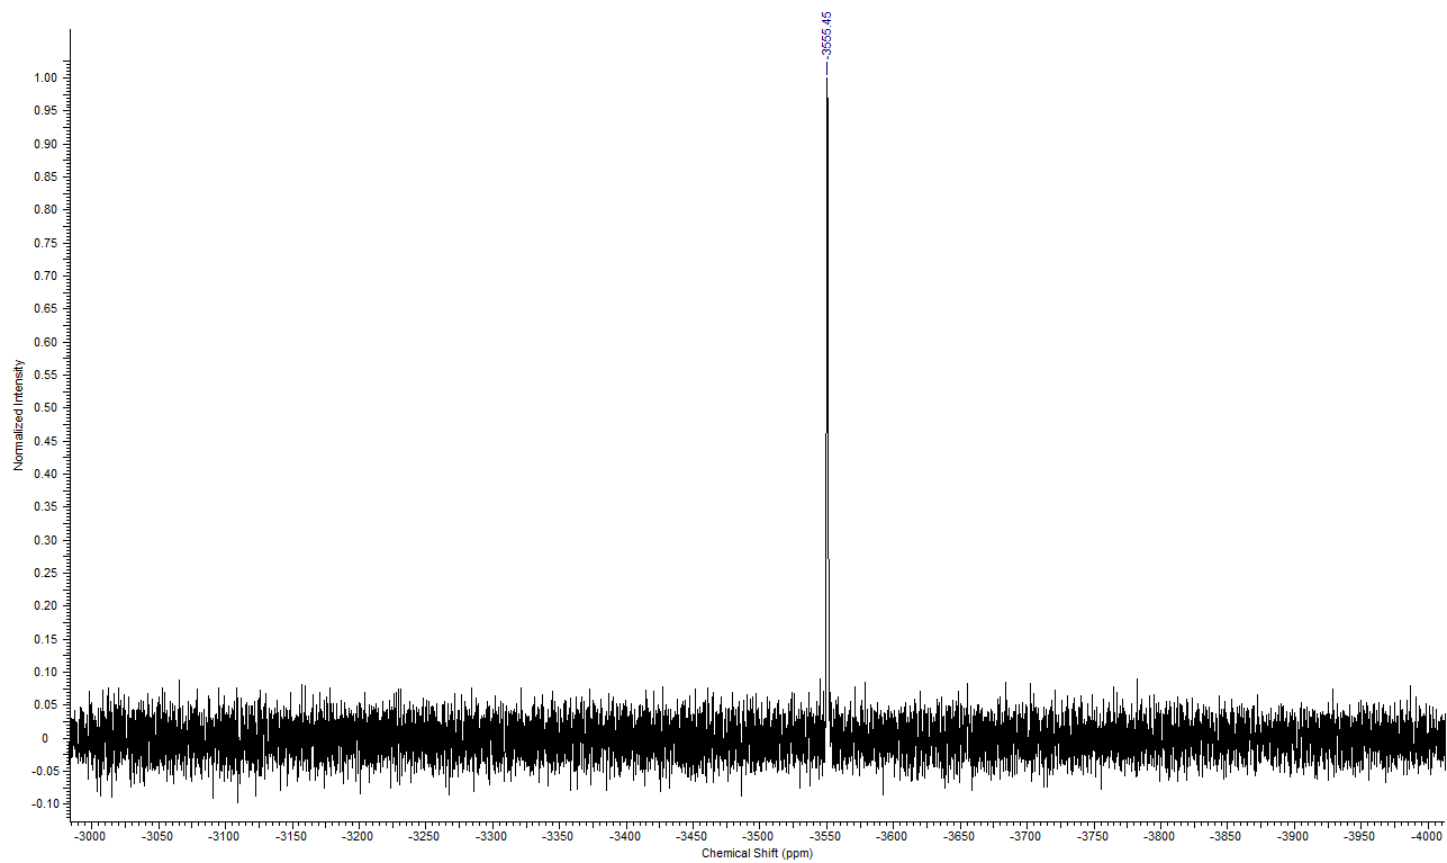

Fig. S 12:  $^{195}\text{Pt}$ -NMR spectrum (108 MHz,  $\text{CDCl}_3$ ) of complex **8d**.

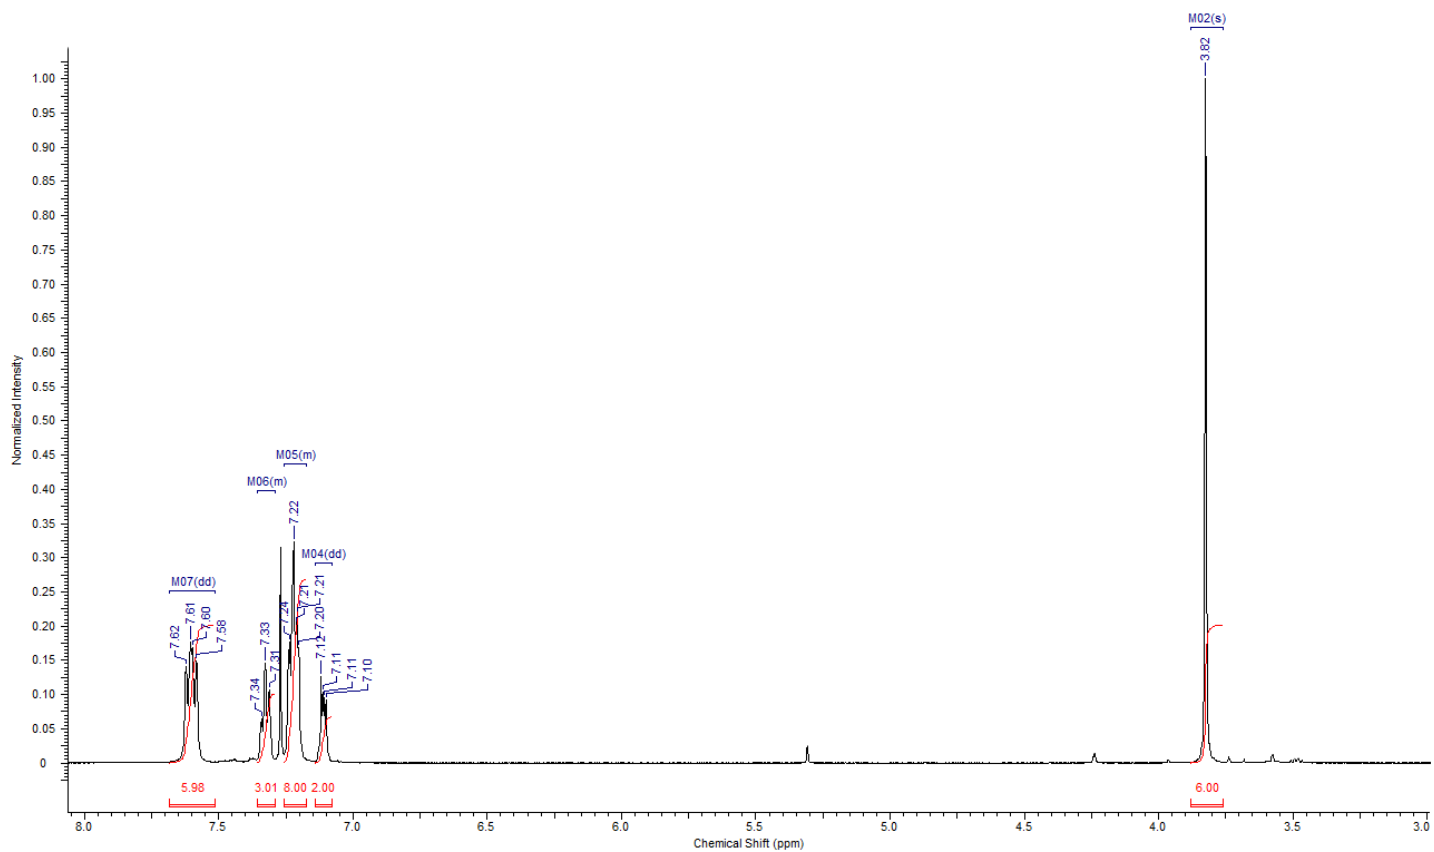

**Fig. S 13:**  $^1\text{H-NMR}$  spectrum (500 MHz,  $\text{CDCl}_3$ ) of complex **9a**.

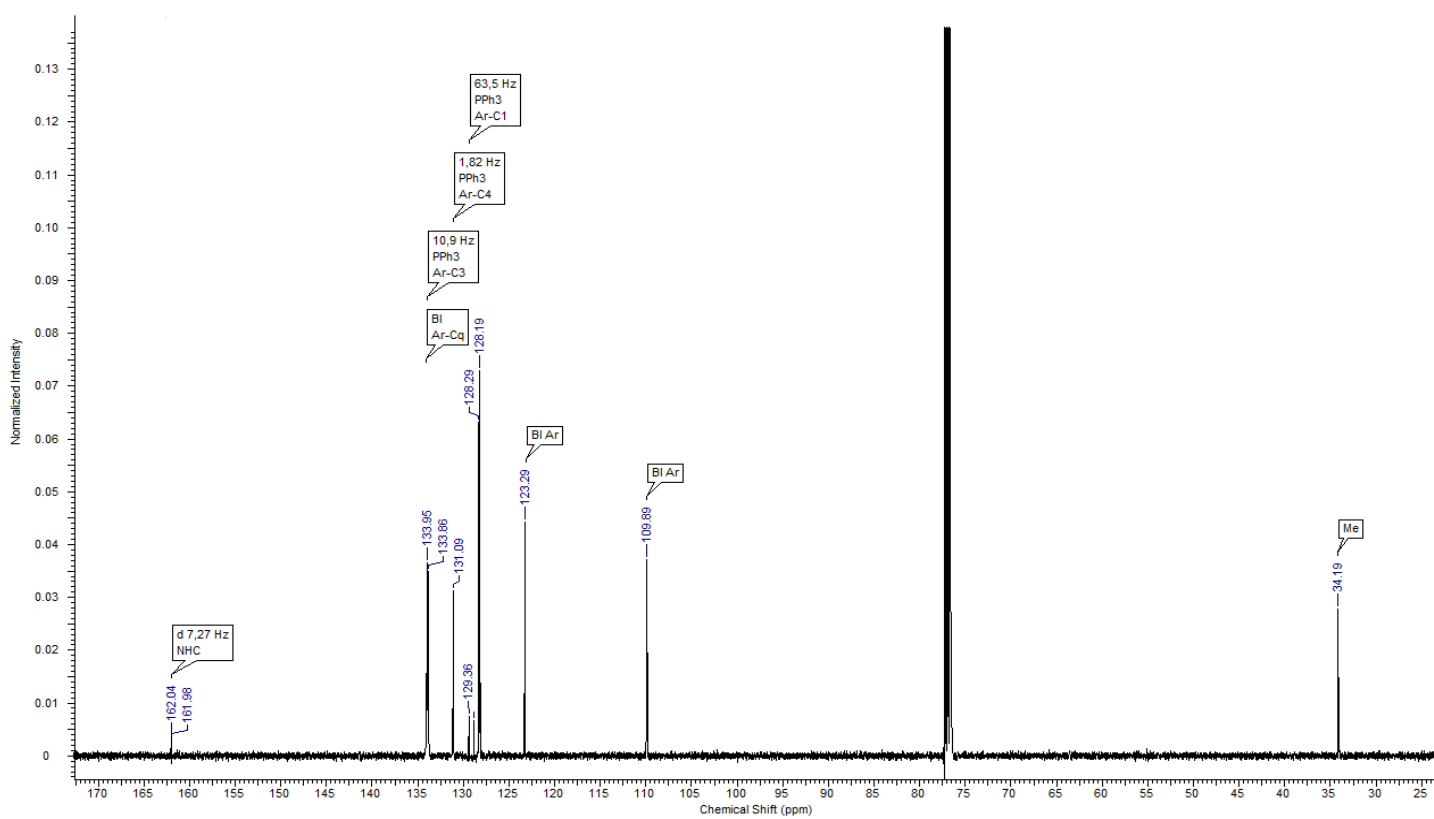

**Fig. S 14:**  $^{13}\text{C-NMR}$  spectrum (126 MHz,  $\text{CDCl}_3$ ) of complex **9a**.

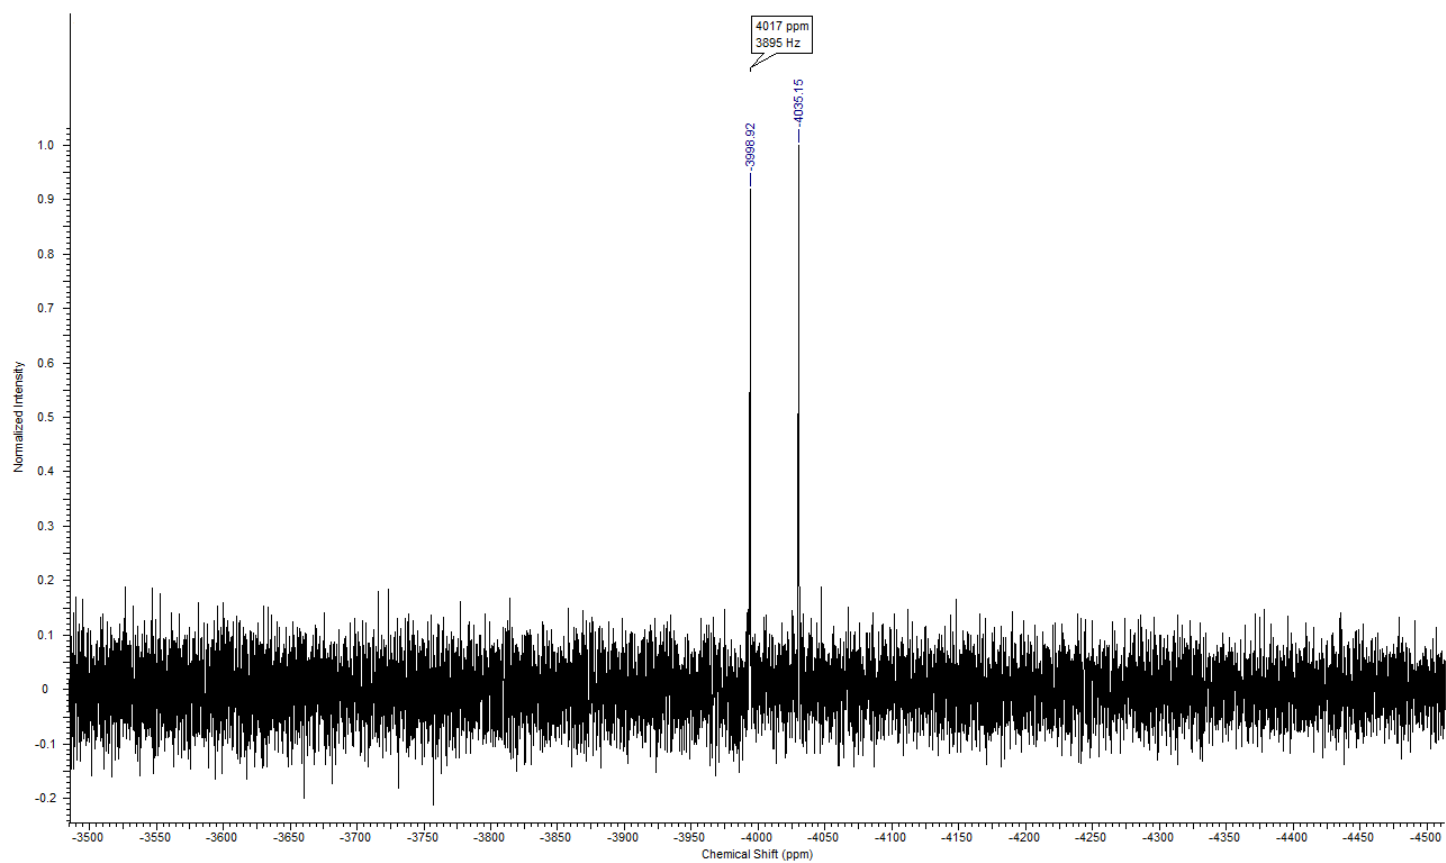

**Fig. S 15:**  $^{195}\text{Pt}$ -NMR spectrum (108 MHz,  $\text{CDCl}_3$ ) of complex **9a**.

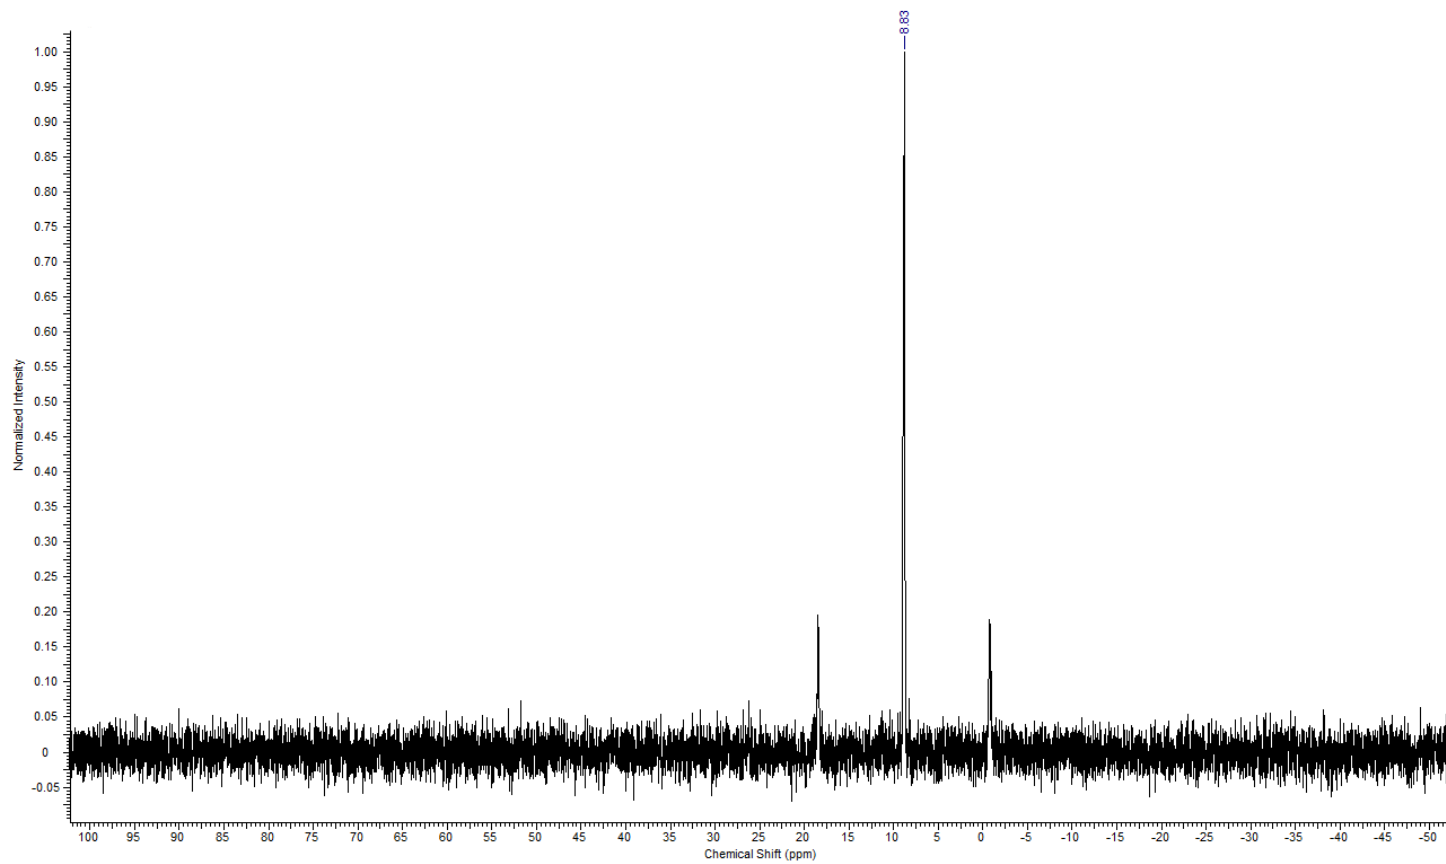

**Fig. S 16:**  $^{31}\text{P}$ -NMR spectrum (202 MHz,  $\text{CDCl}_3$ ) of complex **9a**.

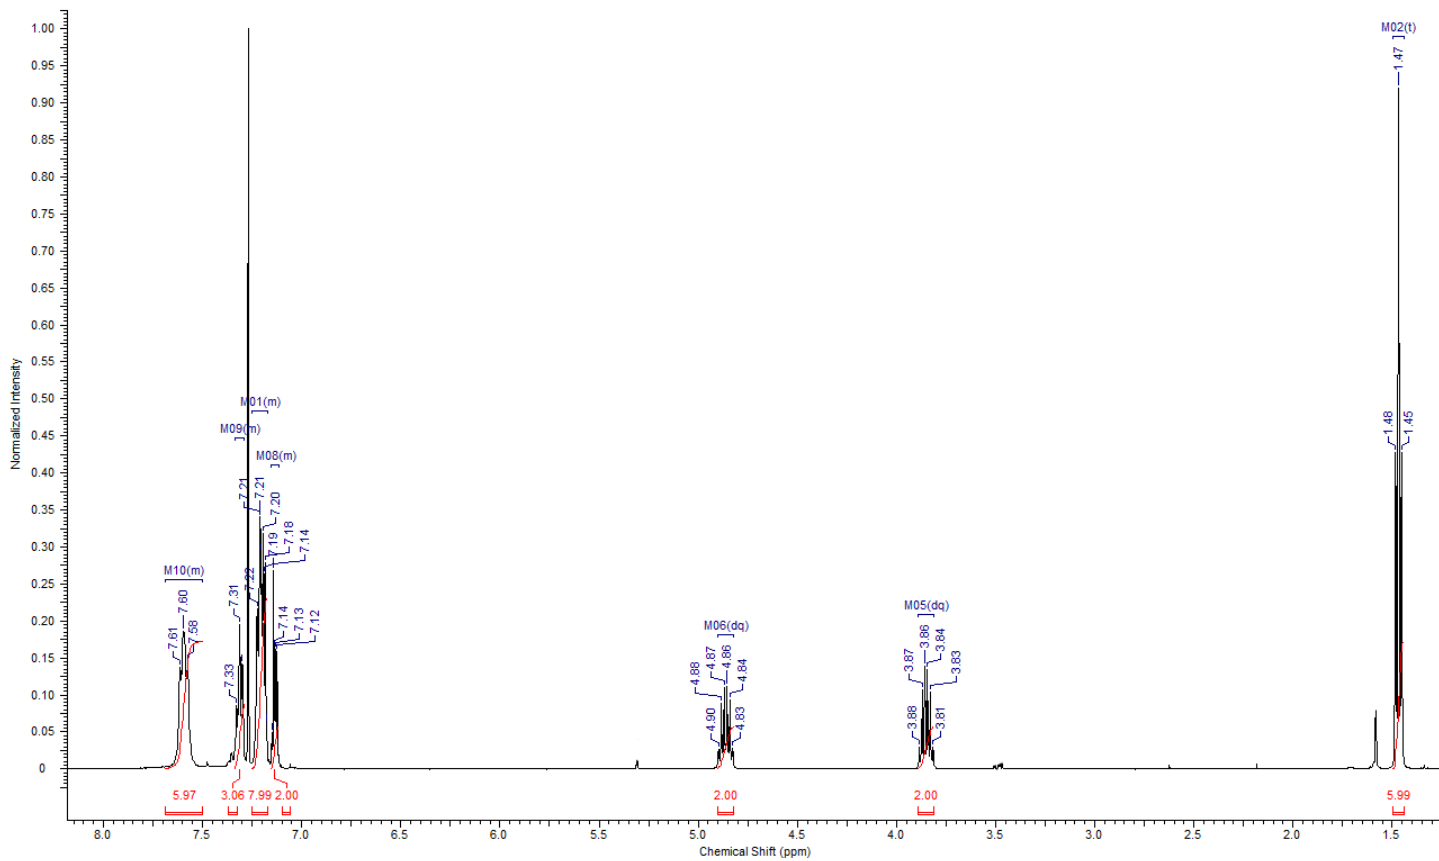

Fig. S 17: <sup>1</sup>H-NMR spectrum (500 MHz, CDCl<sub>3</sub>) of complex 9b.

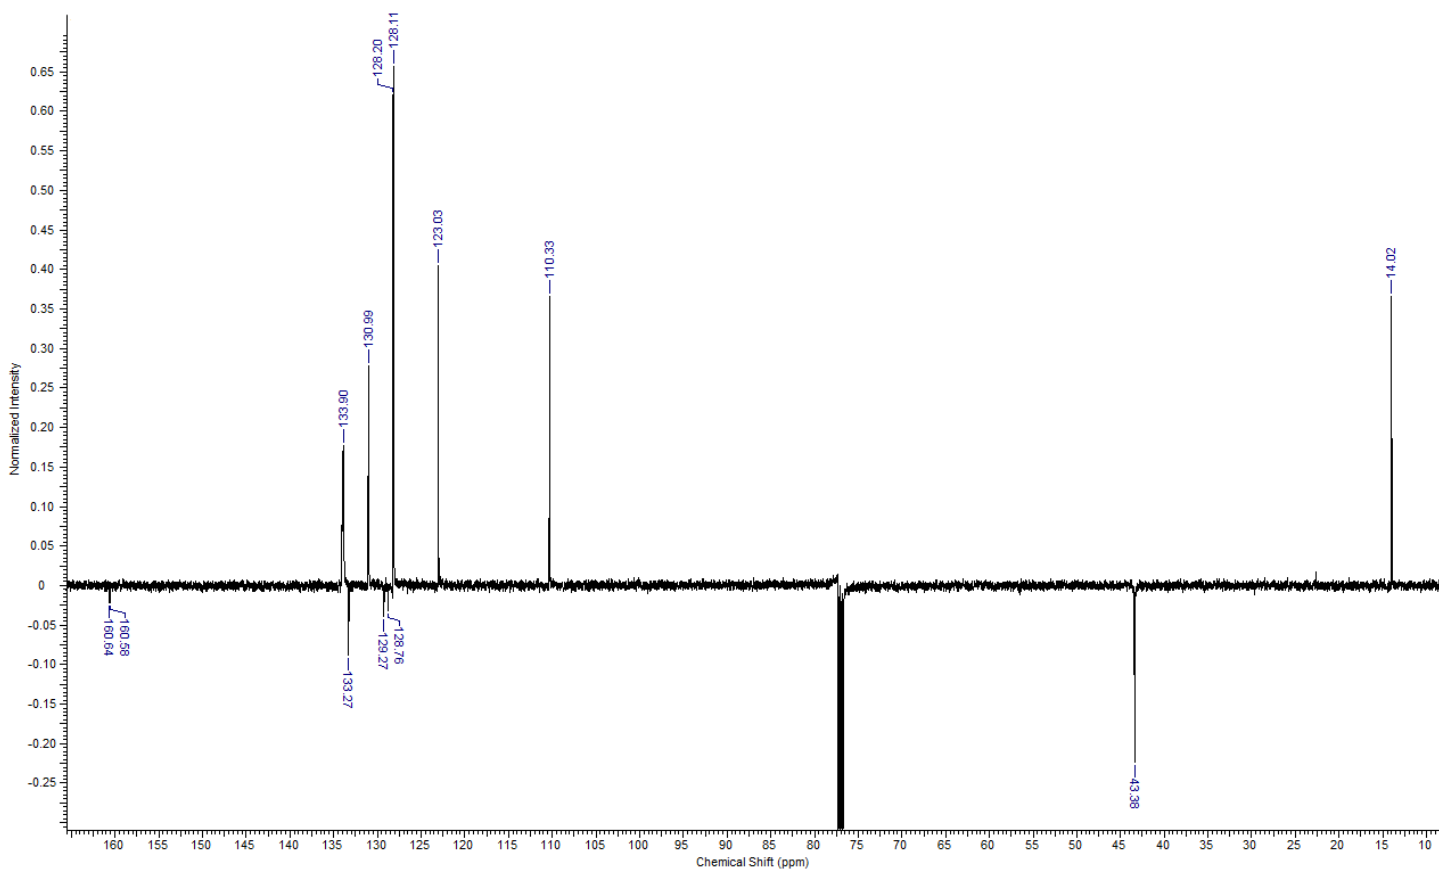

Fig. S 18: <sup>13</sup>C-NMR spectrum (126 MHz, CDCl<sub>3</sub>) of complex 9b.

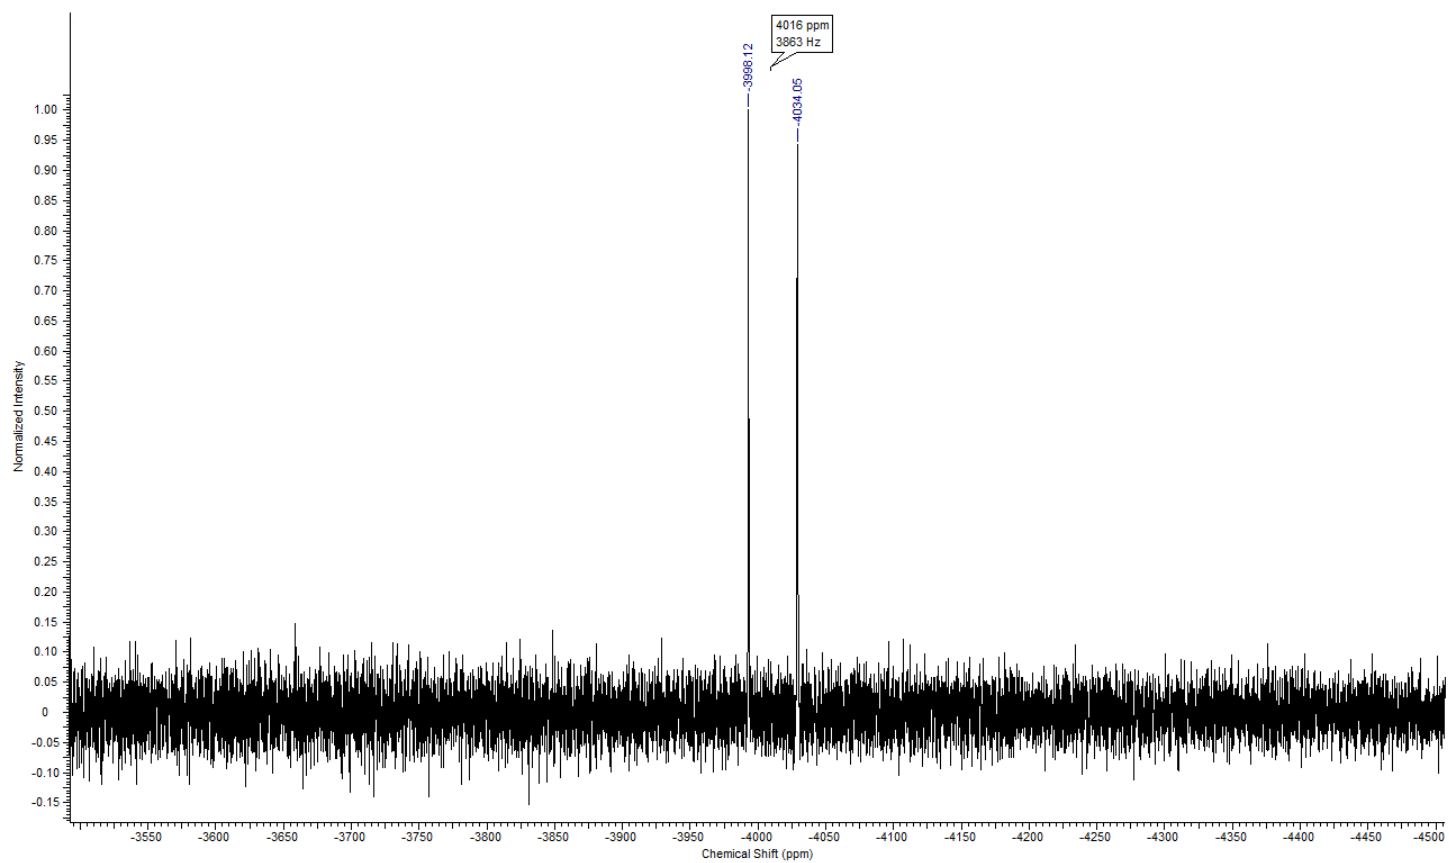

**Fig. S 19:**  $^{195}\text{Pt}$ -NMR spectrum (108 MHz,  $\text{CDCl}_3$ ) of complex **9b**.

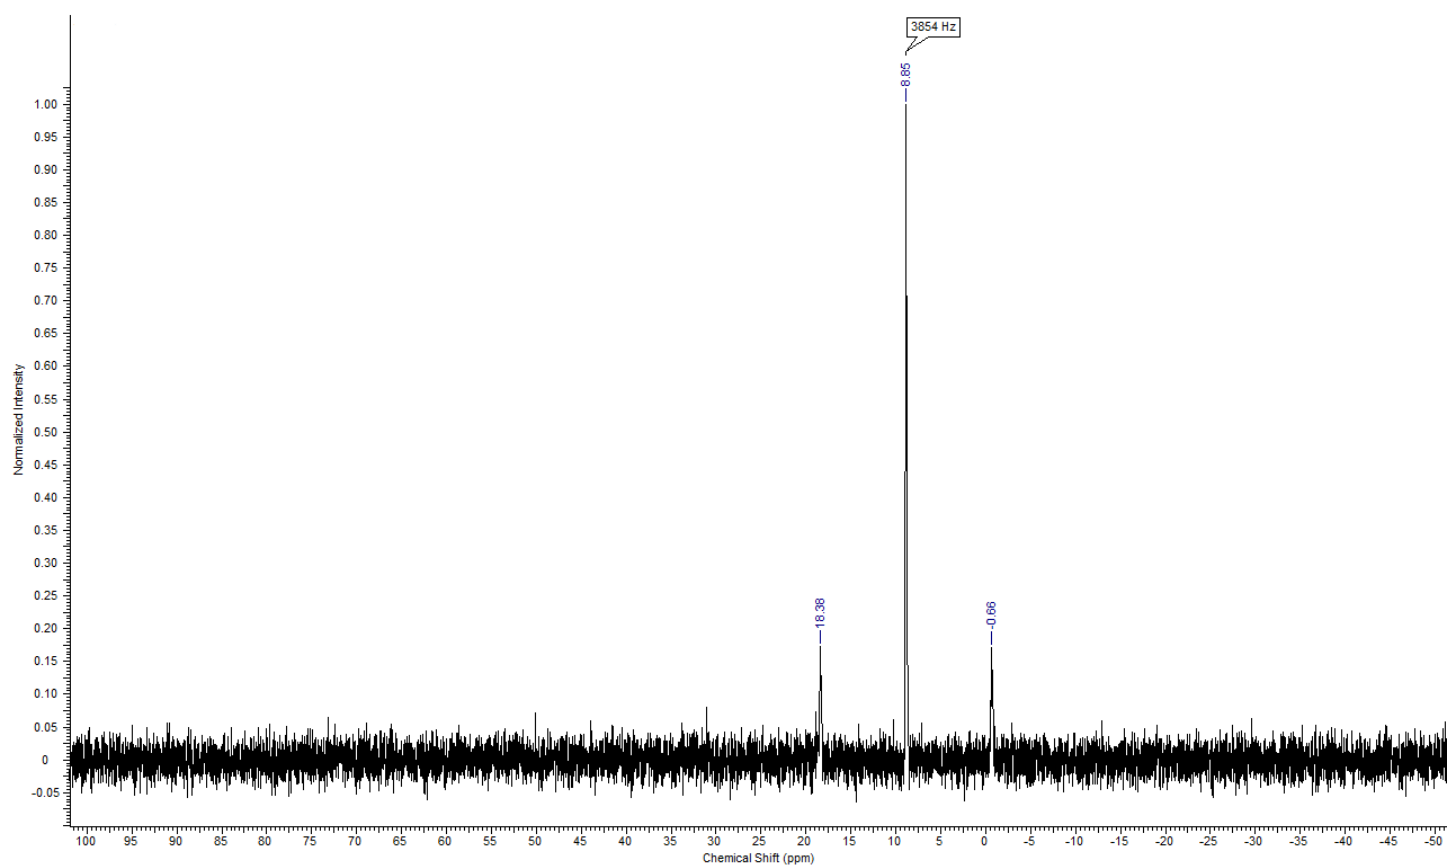

**Fig. S 20:**  $^{31}\text{P}$ -NMR spectrum (202 MHz,  $\text{CDCl}_3$ ) of complex **9b**.

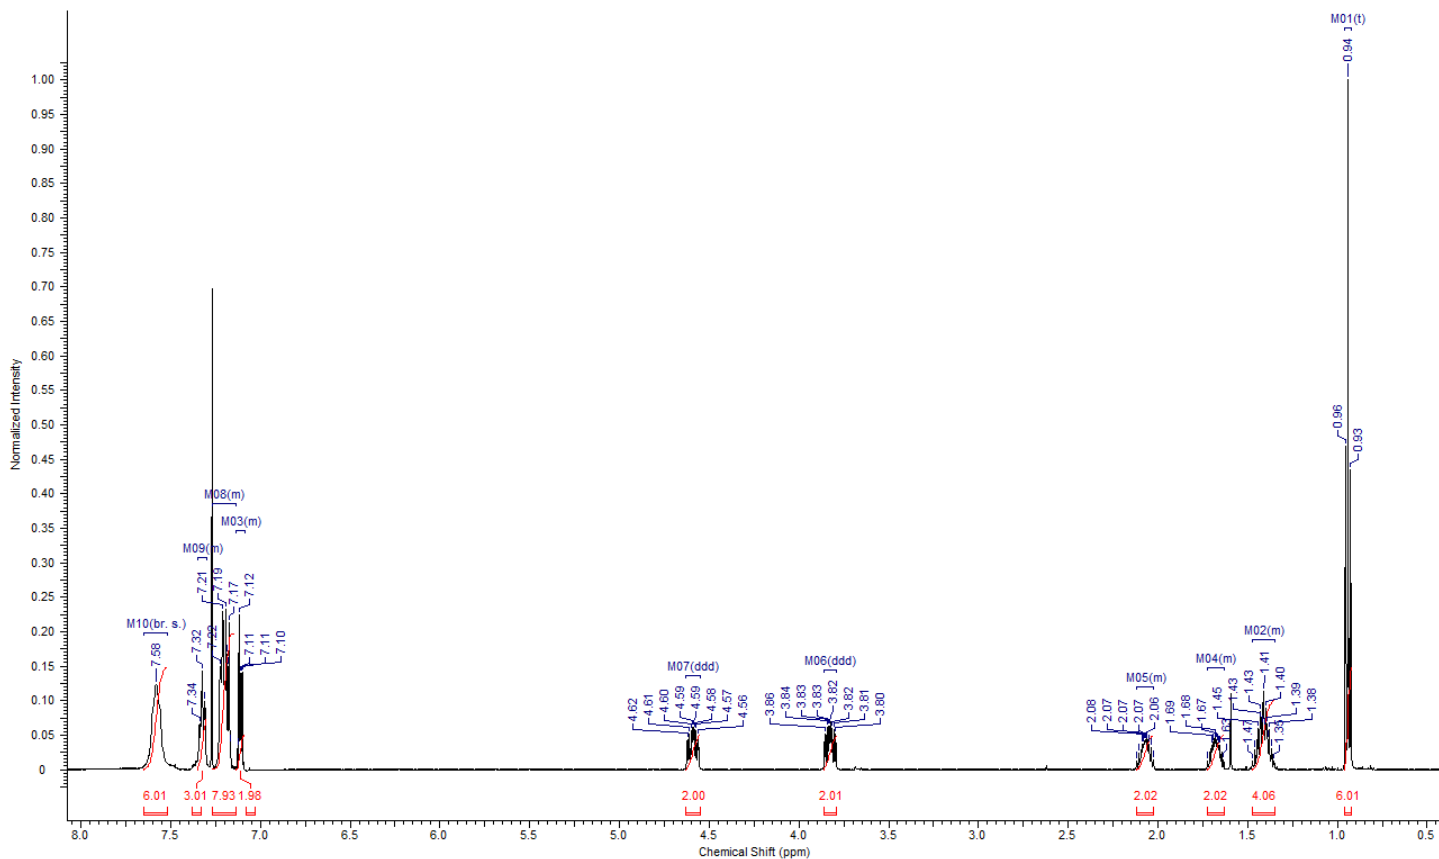

Fig. S 21: <sup>1</sup>H-NMR spectrum (500 MHz, CDCl<sub>3</sub>) of complex **9c**.

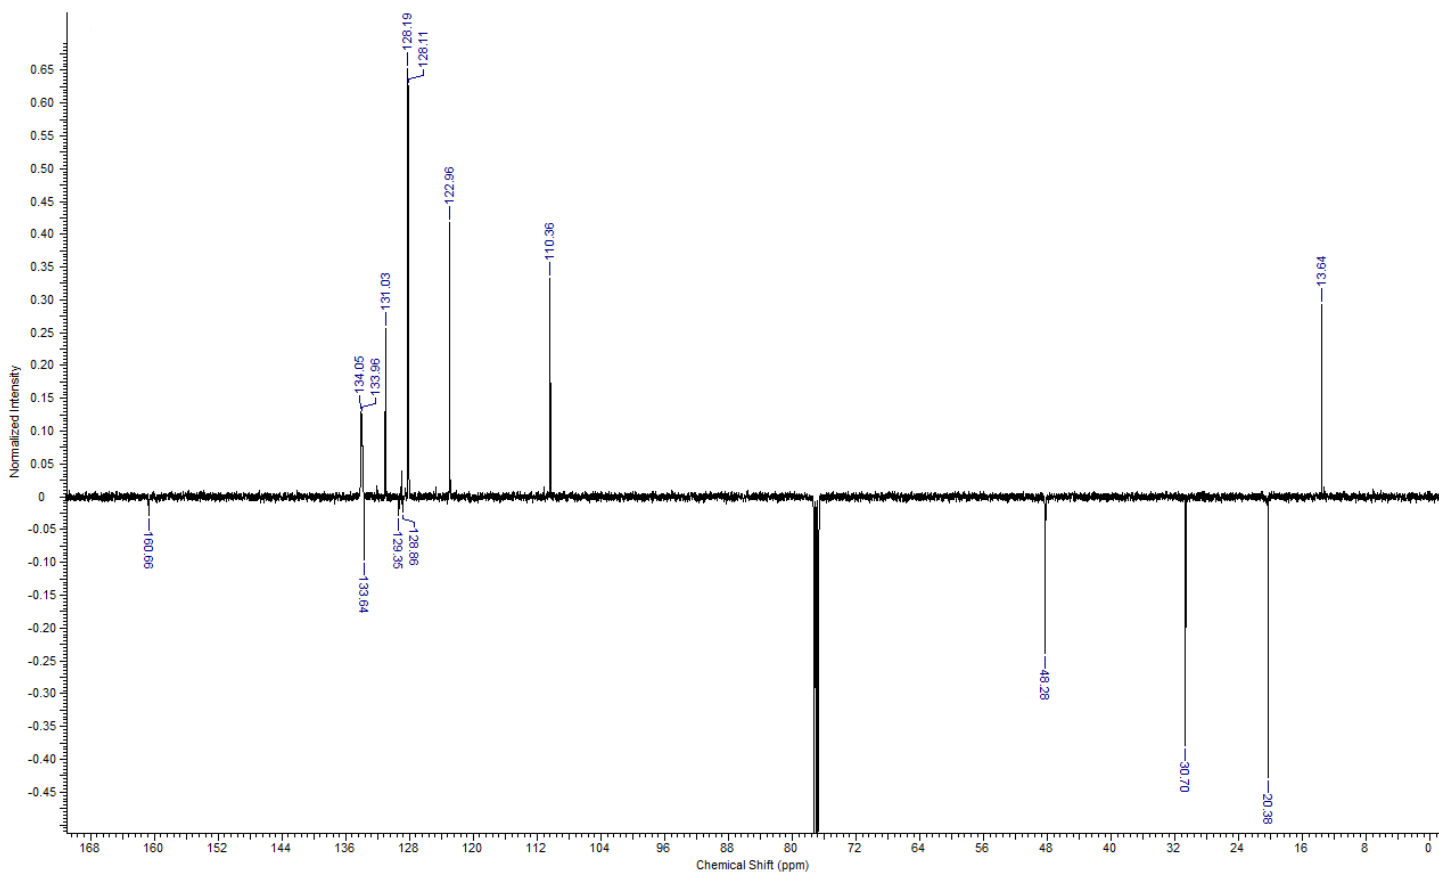

Fig. S 22: <sup>13</sup>C-NMR spectrum (126 MHz, CDCl<sub>3</sub>) of complex **9c**.

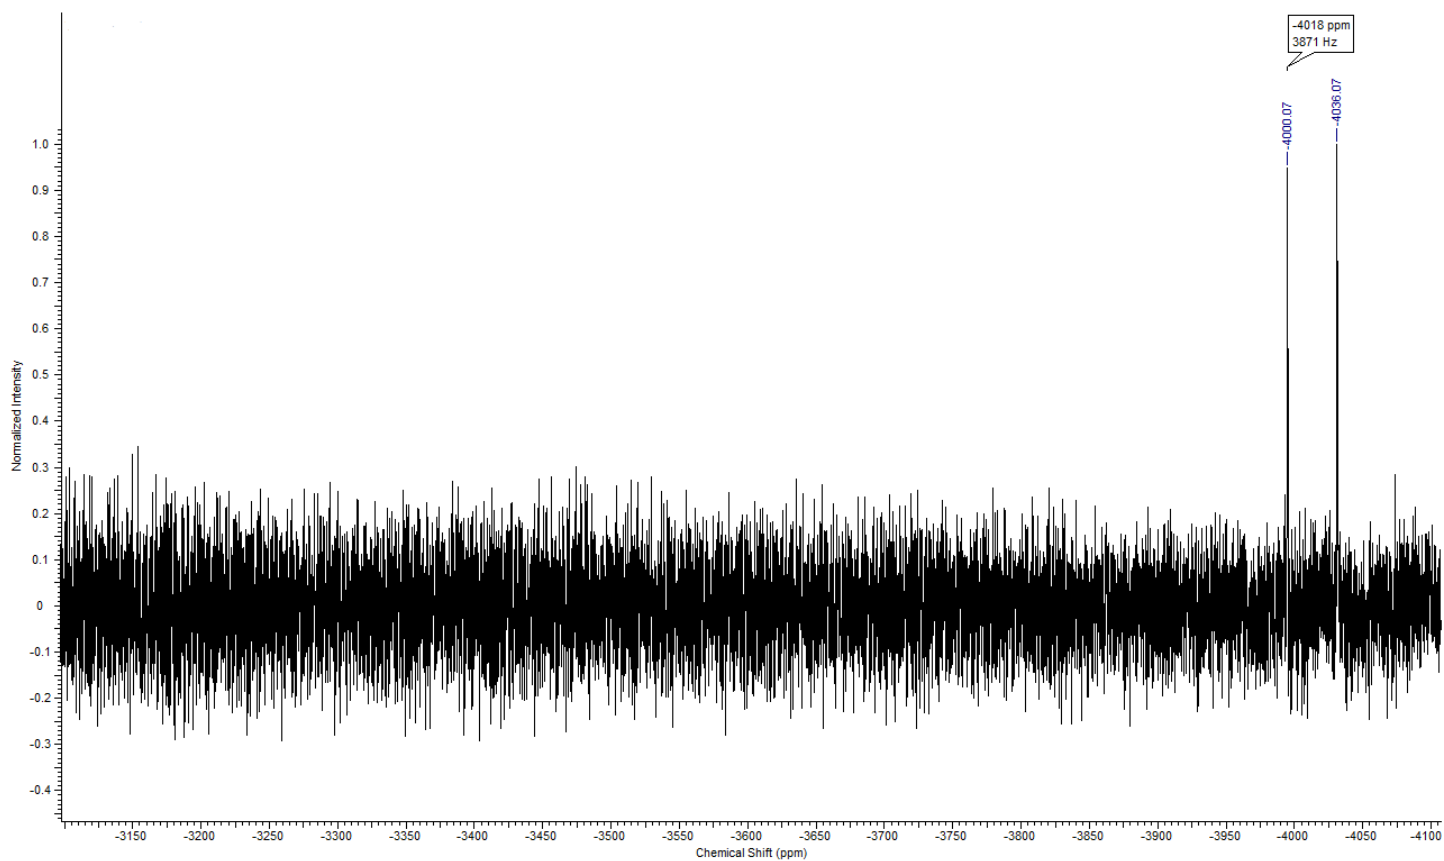

Fig. S 23:  $^{195}\text{Pt}$ -NMR spectrum (108 MHz,  $\text{CDCl}_3$ ) of complex **9c**.

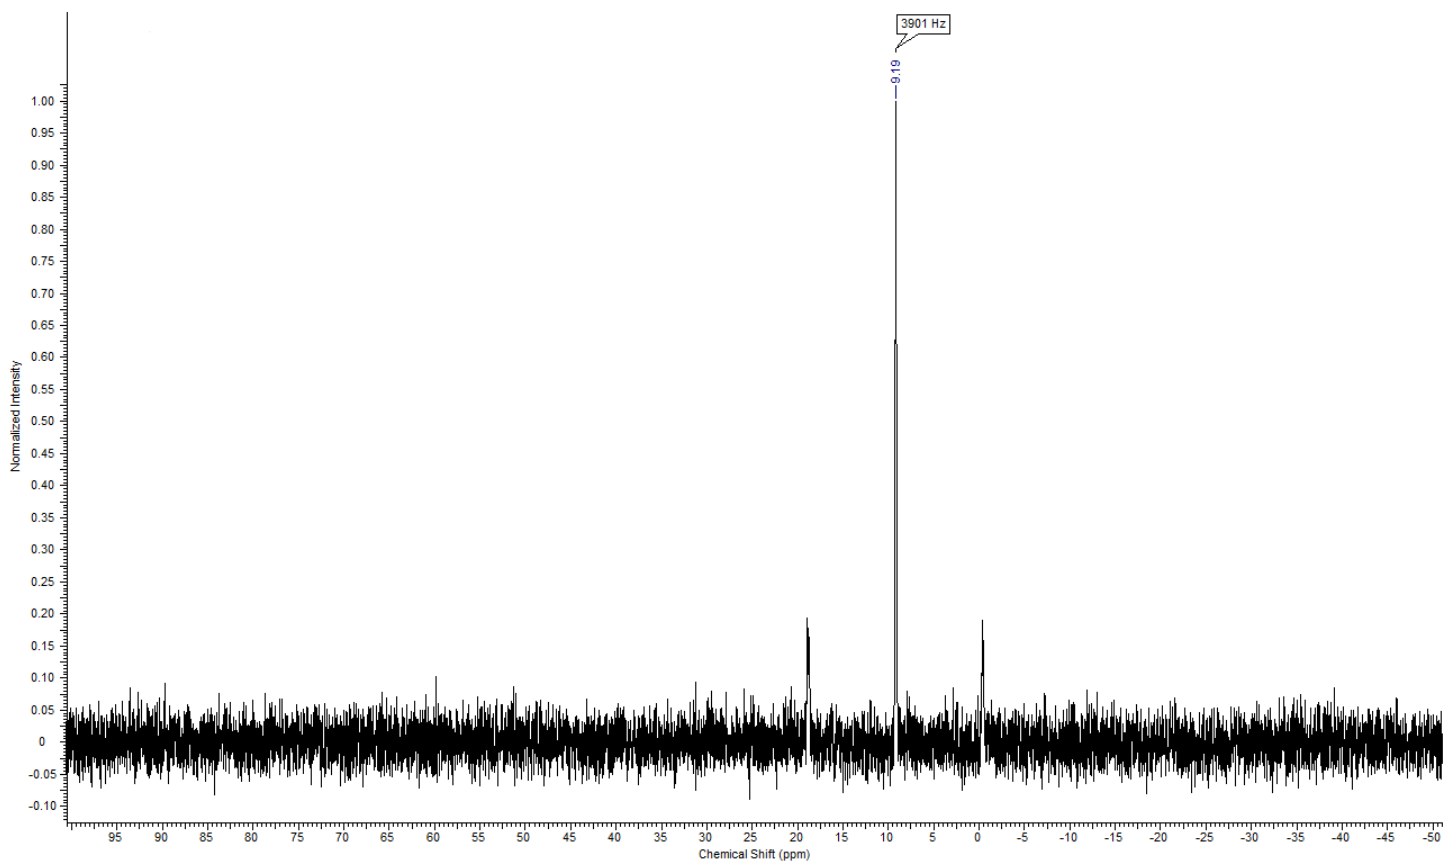

Fig. S 24:  $^{31}\text{P}$ -NMR spectrum (202 MHz,  $\text{CDCl}_3$ ) of complex **9c**.



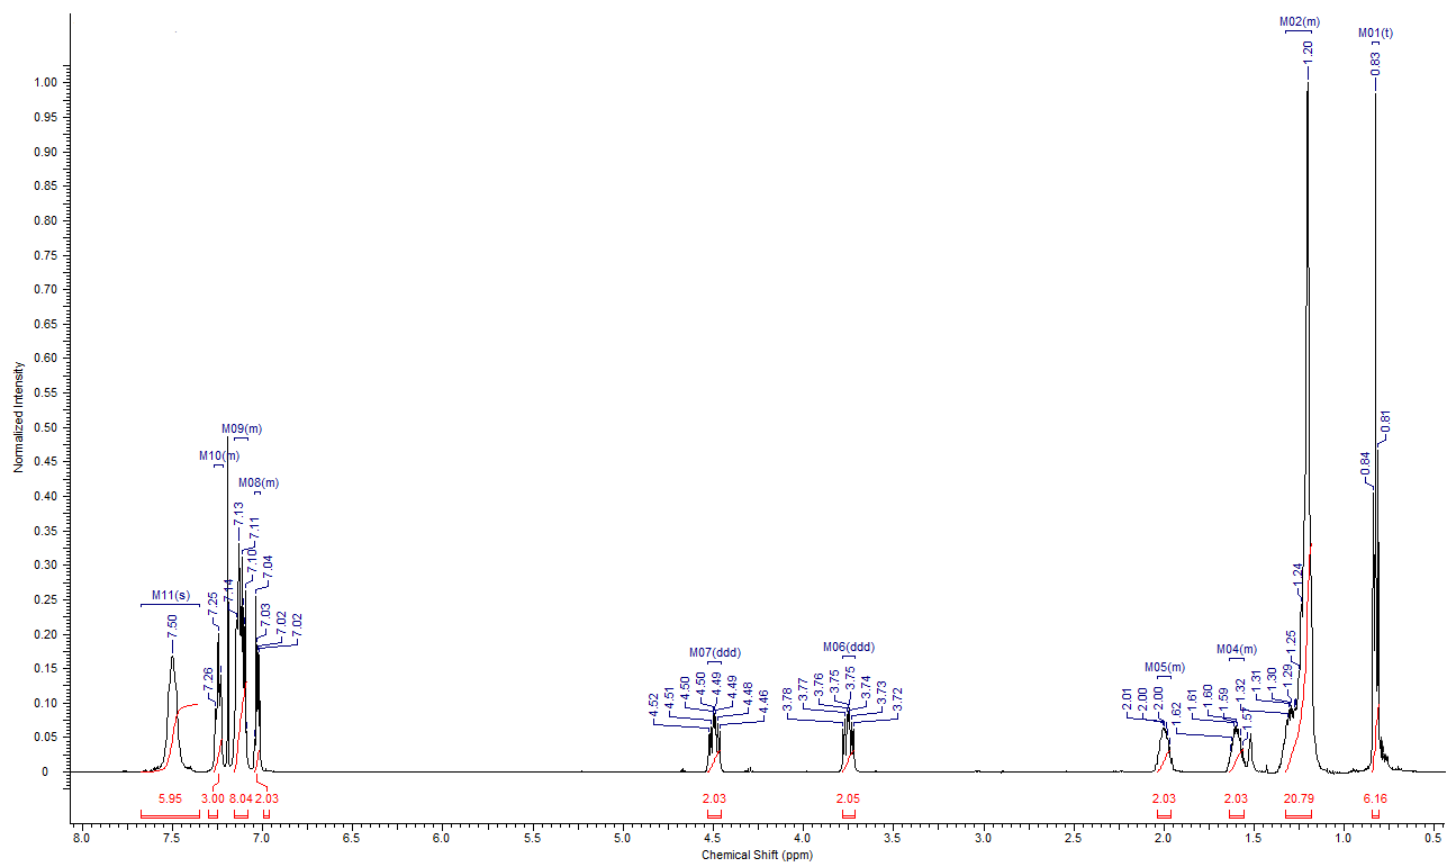

Fig. S 25: <sup>1</sup>H-NMR spectrum (500 MHz, CDCl<sub>3</sub>) of complex **9d**.

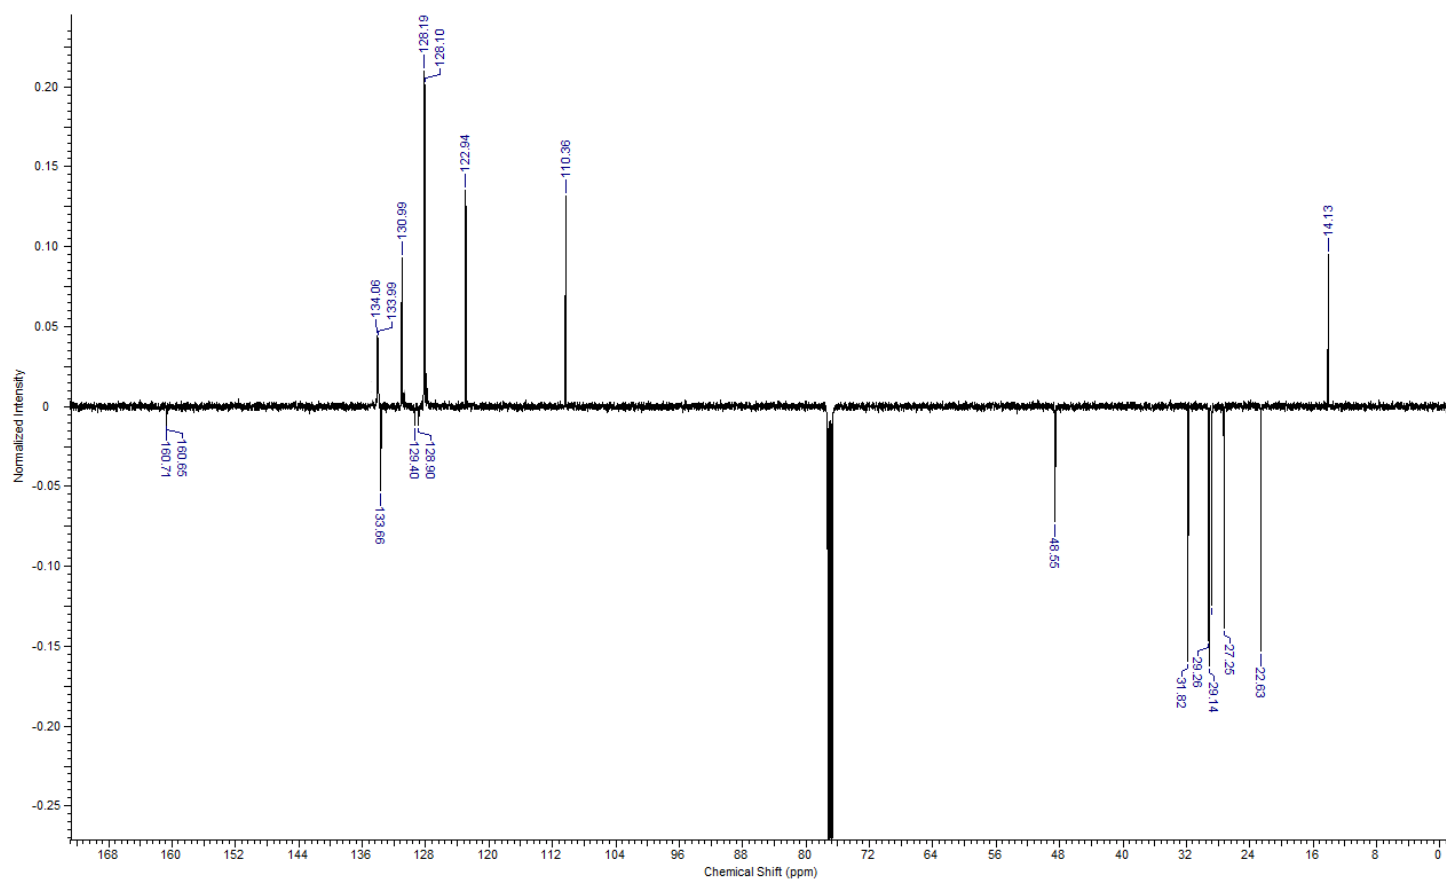

Fig. S 26: <sup>13</sup>C-NMR spectrum (126 MHz, CDCl<sub>3</sub>) of complex **9d**.

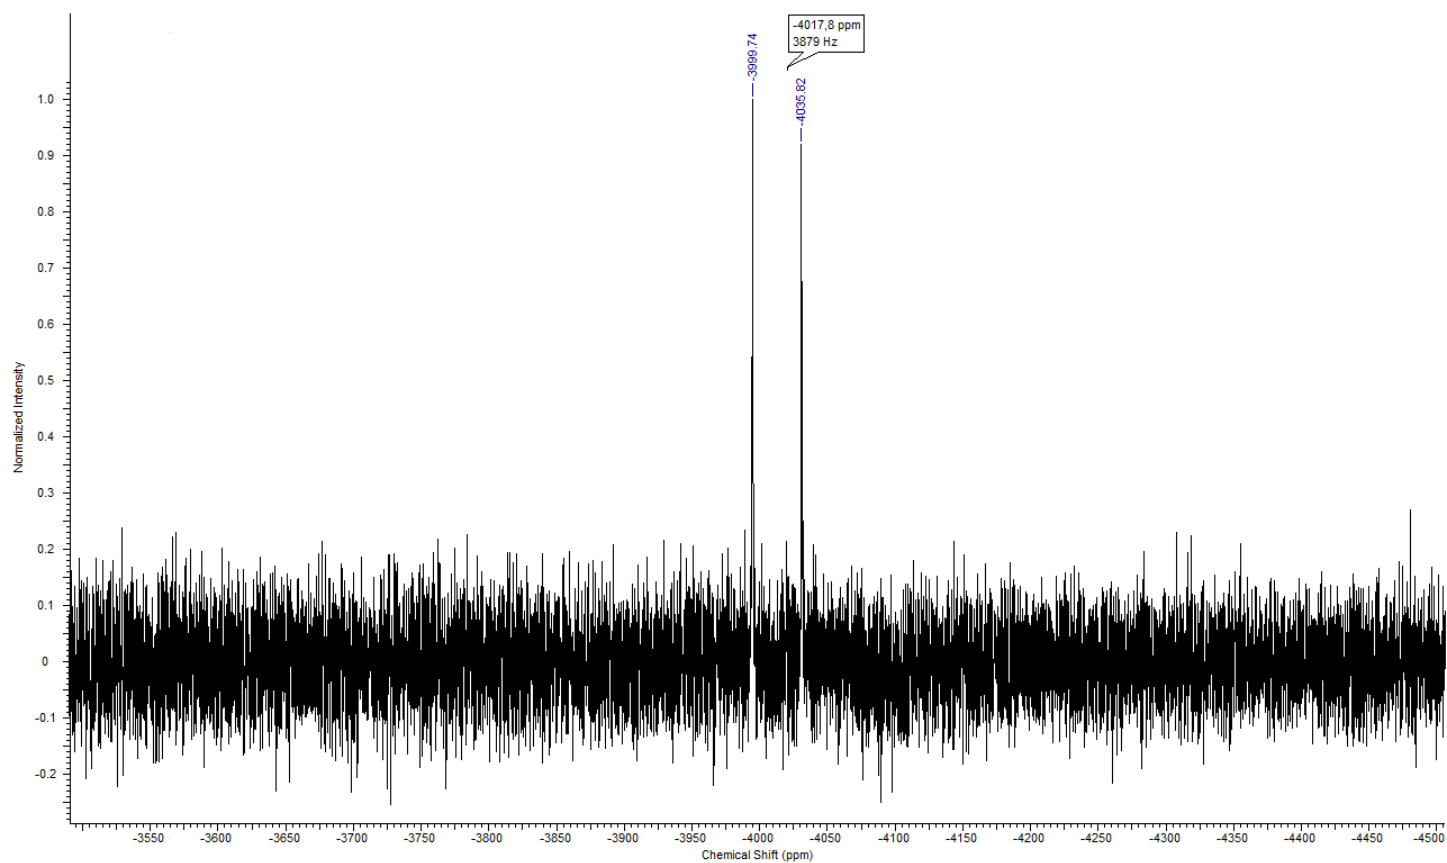

**Fig. S 27:**  $^{195}\text{Pt}$ -NMR spectrum (108 MHz,  $\text{CDCl}_3$ ) of complex **9d**.

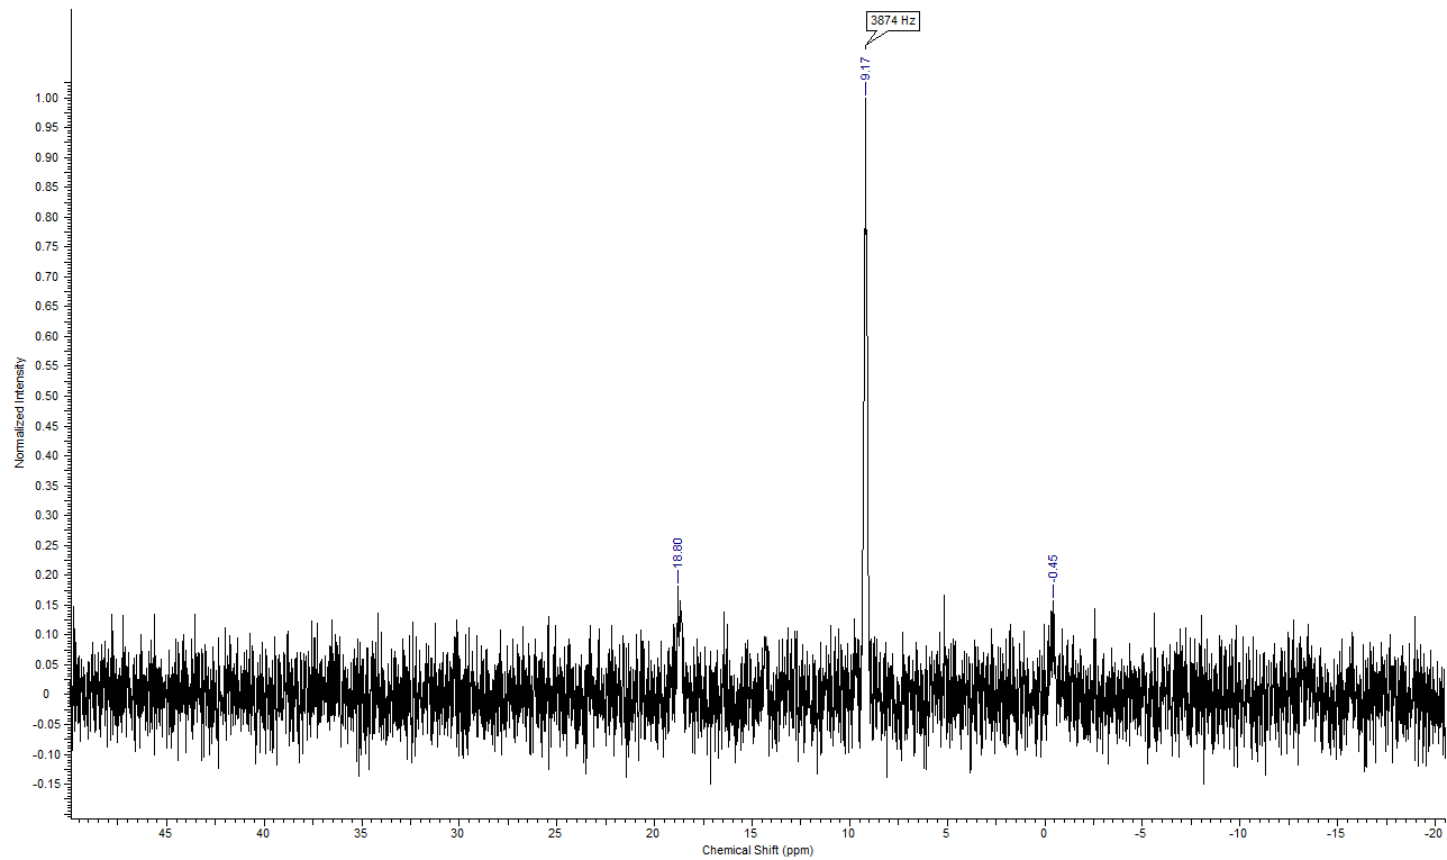

**Fig. S 28:**  $^{31}\text{P}$ -NMR spectrum (202 MHz,  $\text{CDCl}_3$ ) of complex **9d**.

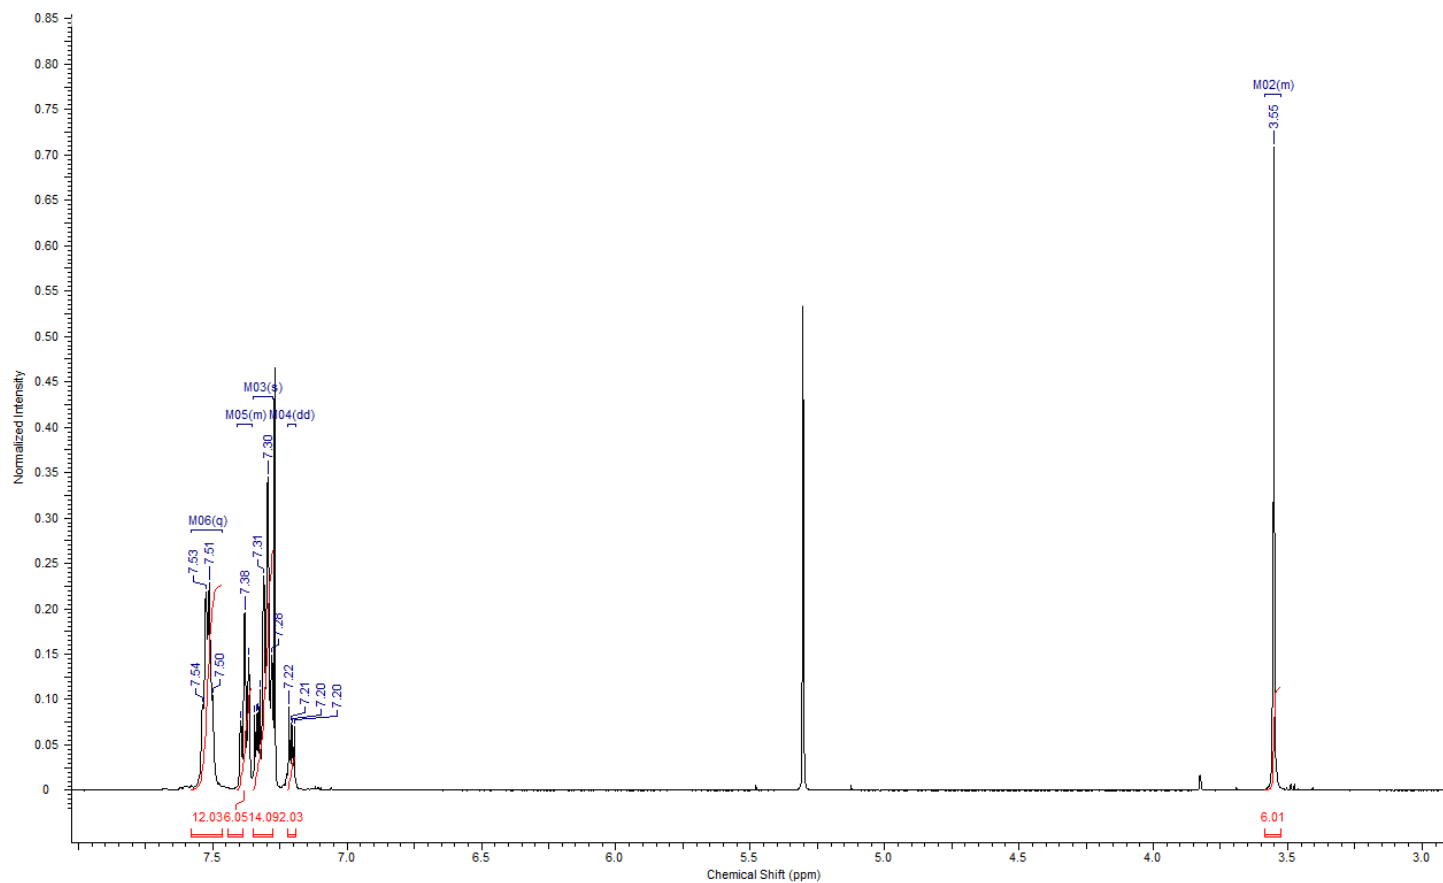

Fig. S 29:  $^1\text{H-NMR}$  spectrum (500 MHz,  $\text{CDCl}_3$ ) of complex **10a**.

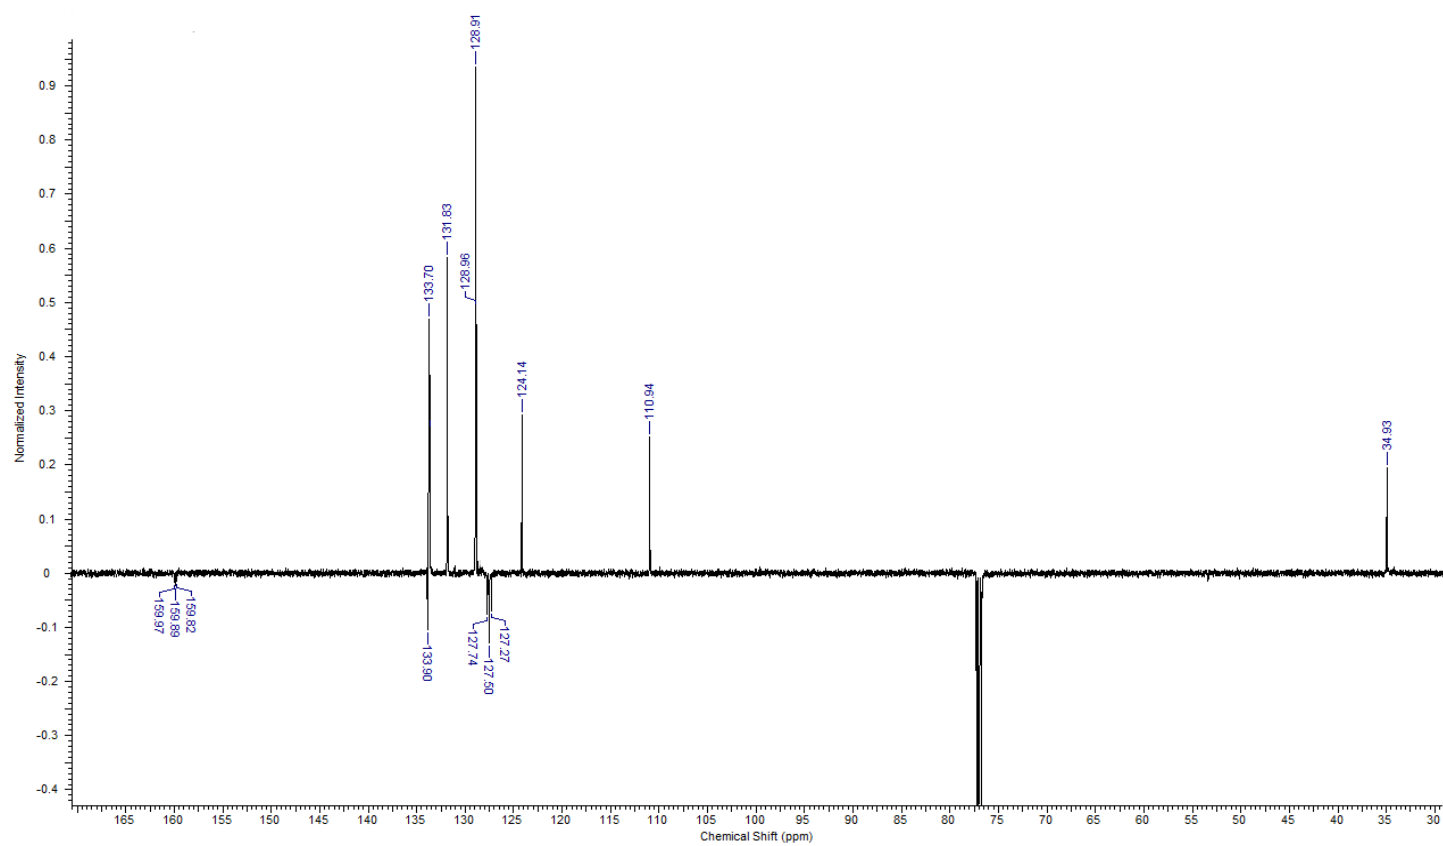

Fig. S 30:  $^{13}\text{C-NMR}$  spectrum (126 MHz,  $\text{CDCl}_3$ ) of complex **10a**.

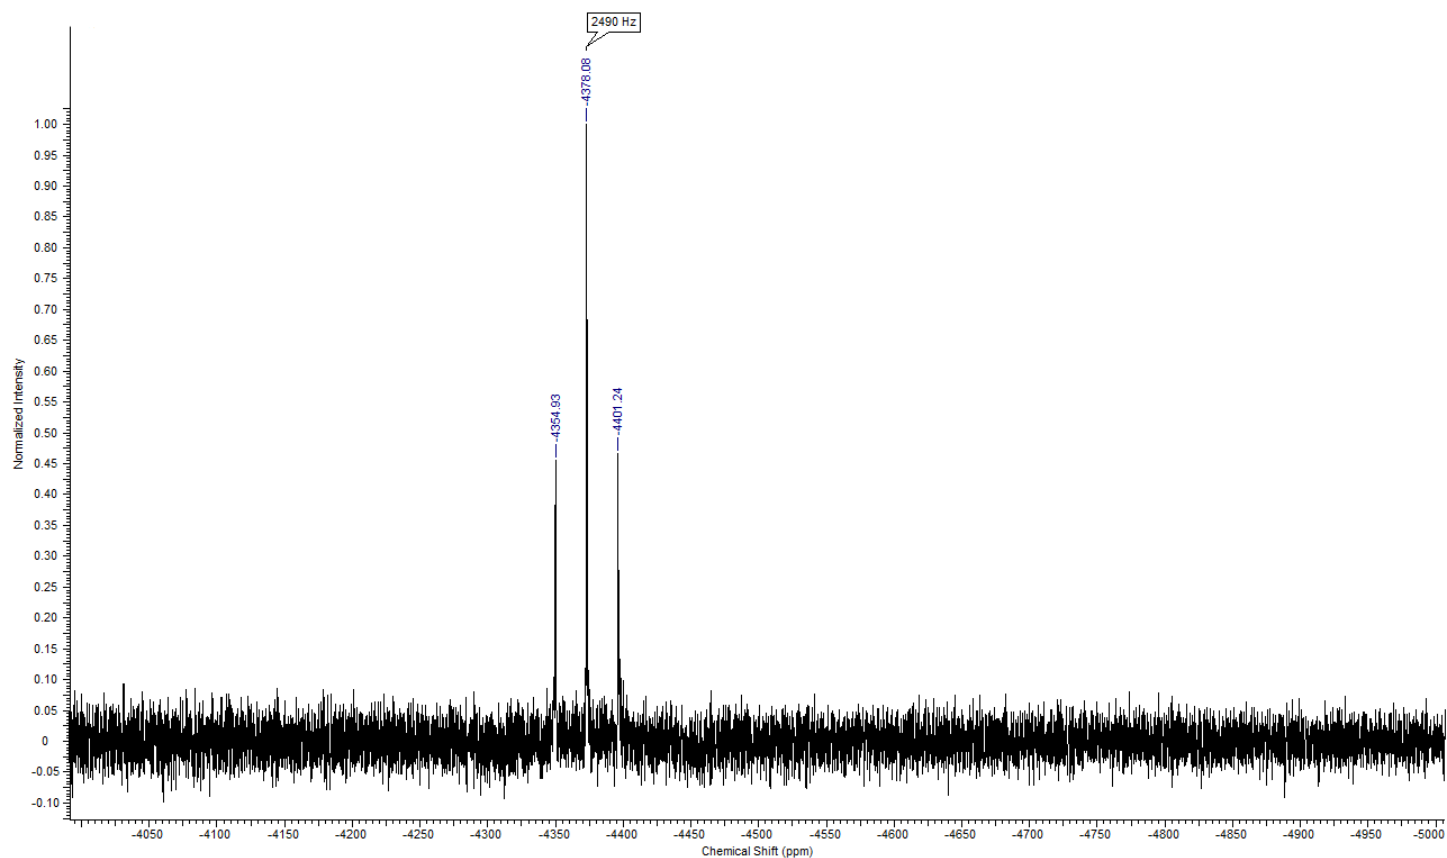

Fig. S 31:  $^{195}\text{Pt}$ -NMR spectrum (108 MHz,  $\text{CDCl}_3$ ) of complex **10a**.

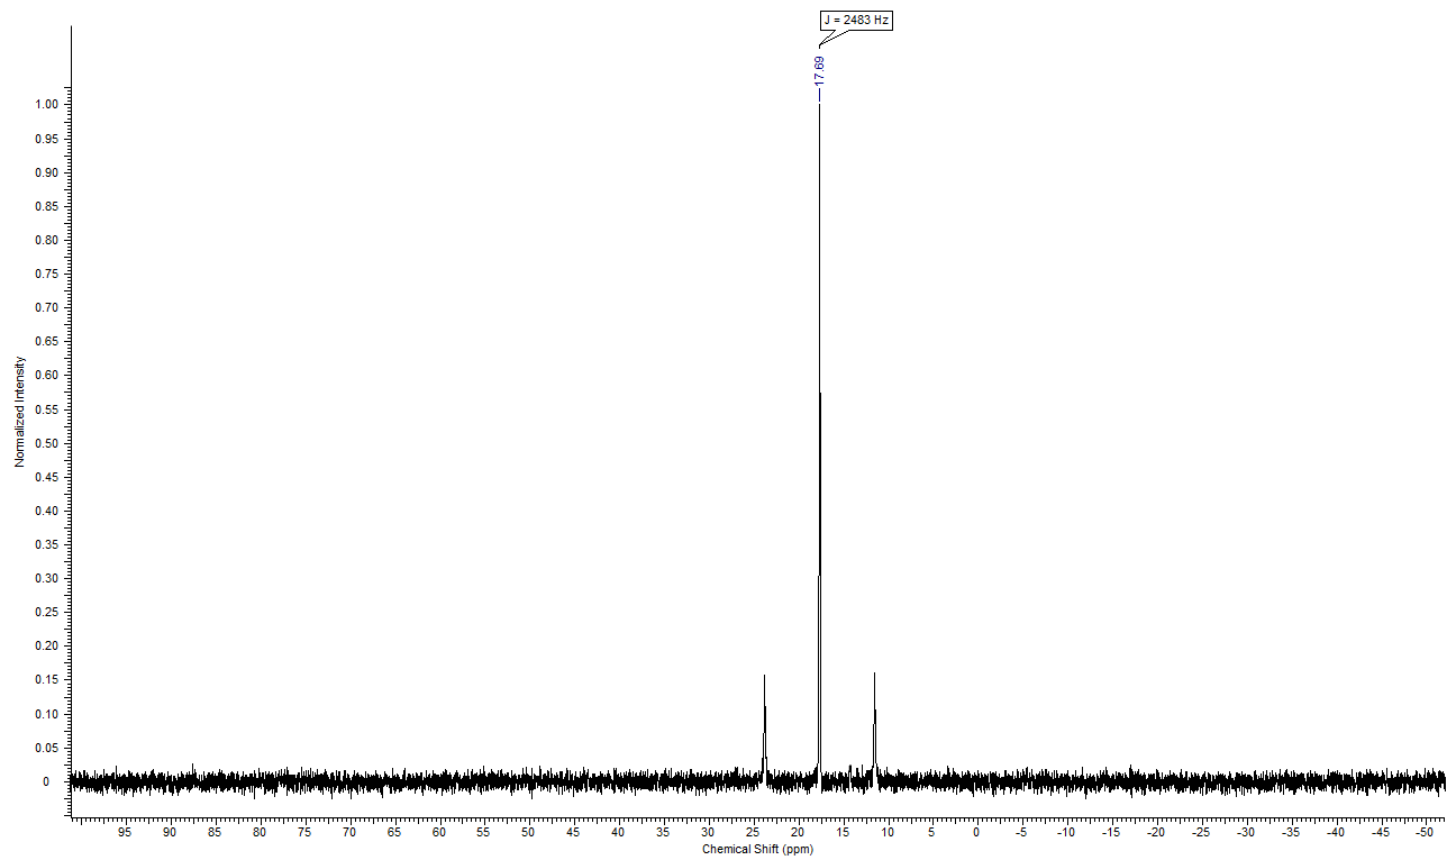

Fig. S 32:  $^{31}\text{P}$ -NMR spectrum (202 MHz,  $\text{CDCl}_3$ ) of complex **10a**.

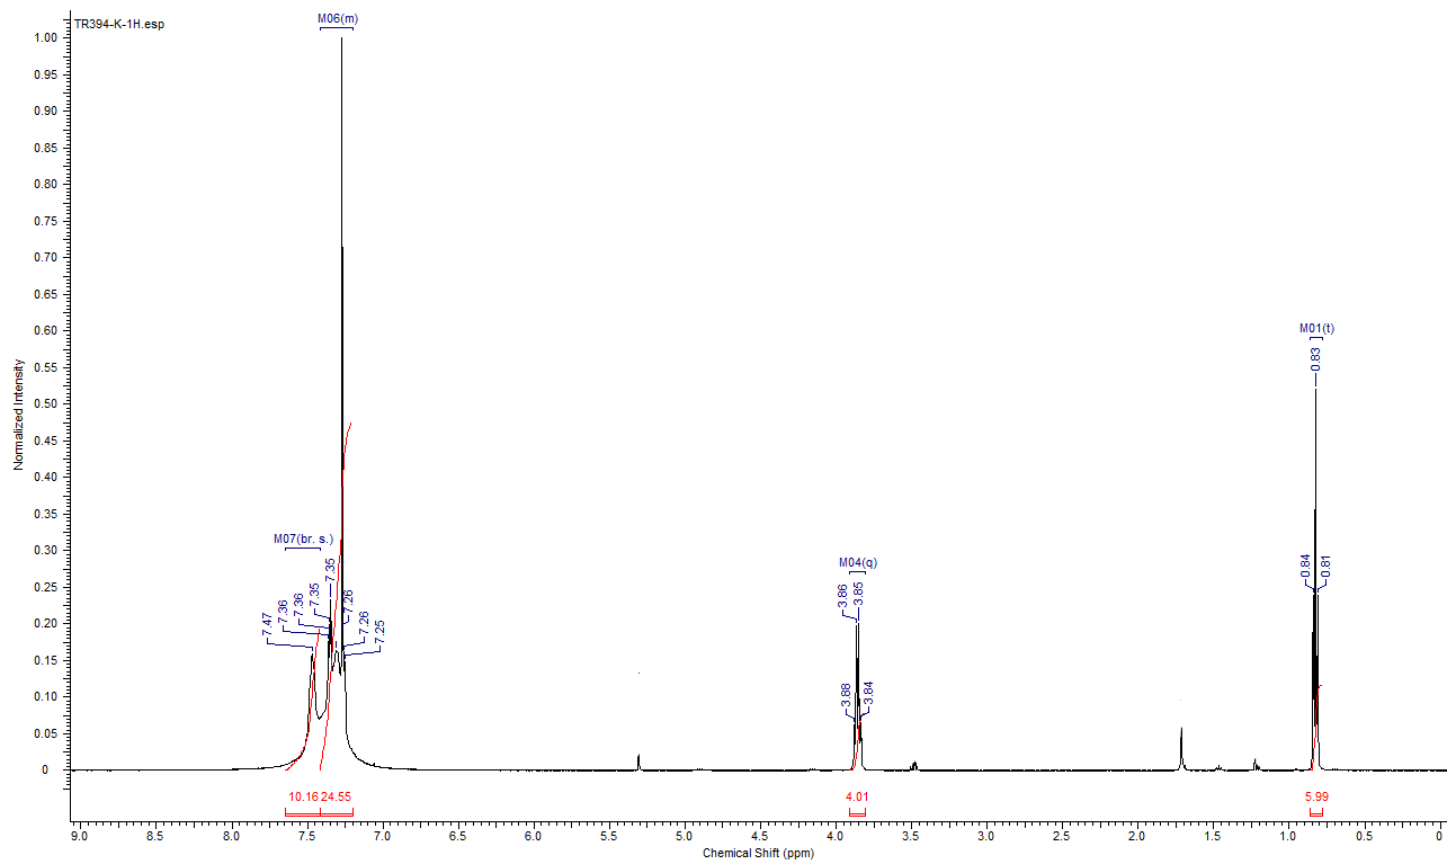

Fig. S 33:  $^1\text{H}$ -NMR spectrum (500 MHz,  $\text{CDCl}_3$ ) of complex **10b**.

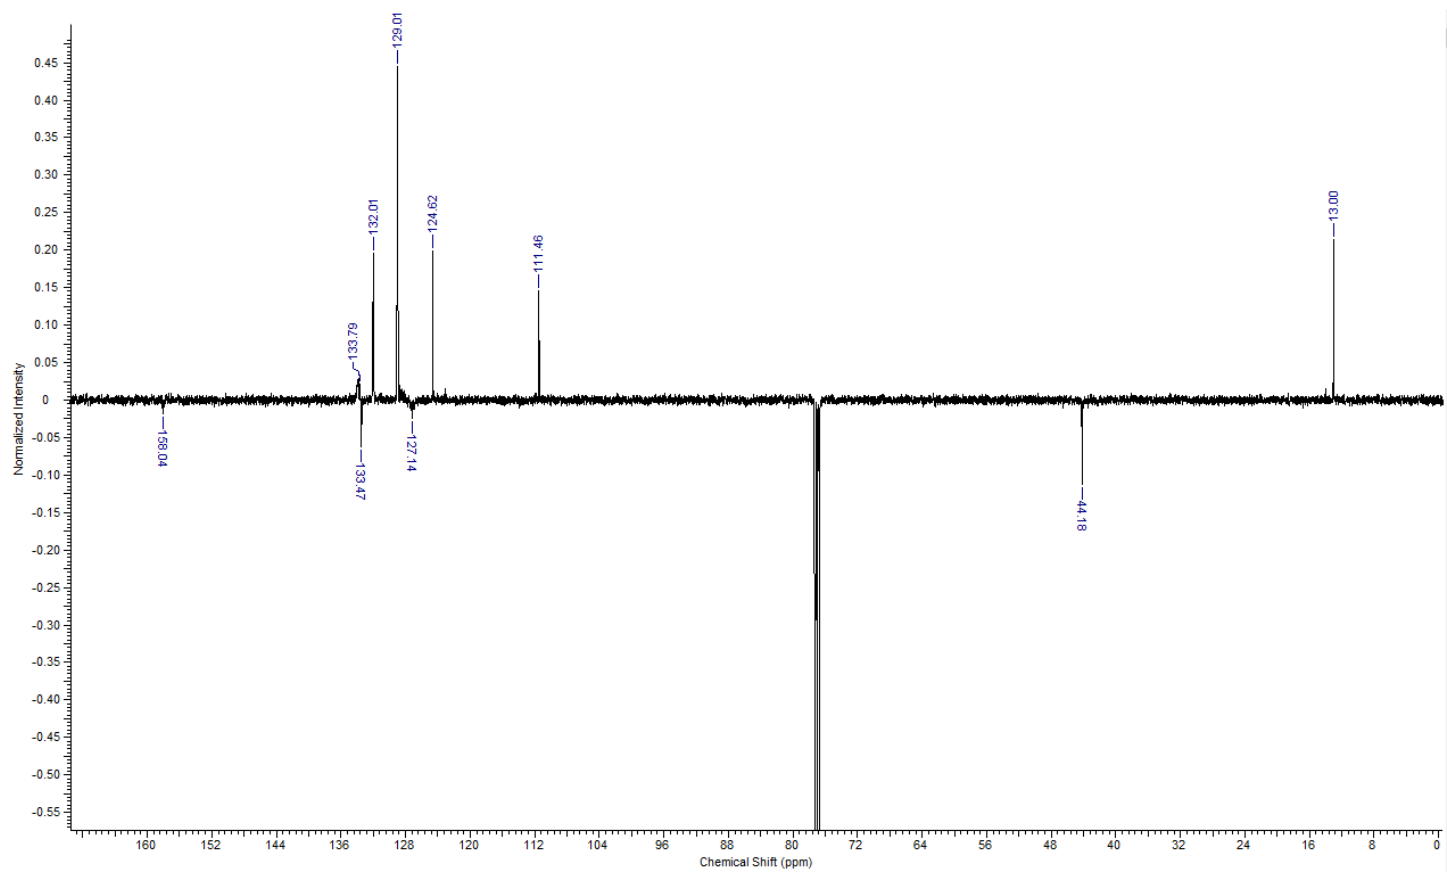

Fig. S 34:  $^{13}\text{C}$ -NMR spectrum (126 MHz,  $\text{CDCl}_3$ ) of complex **10b**.

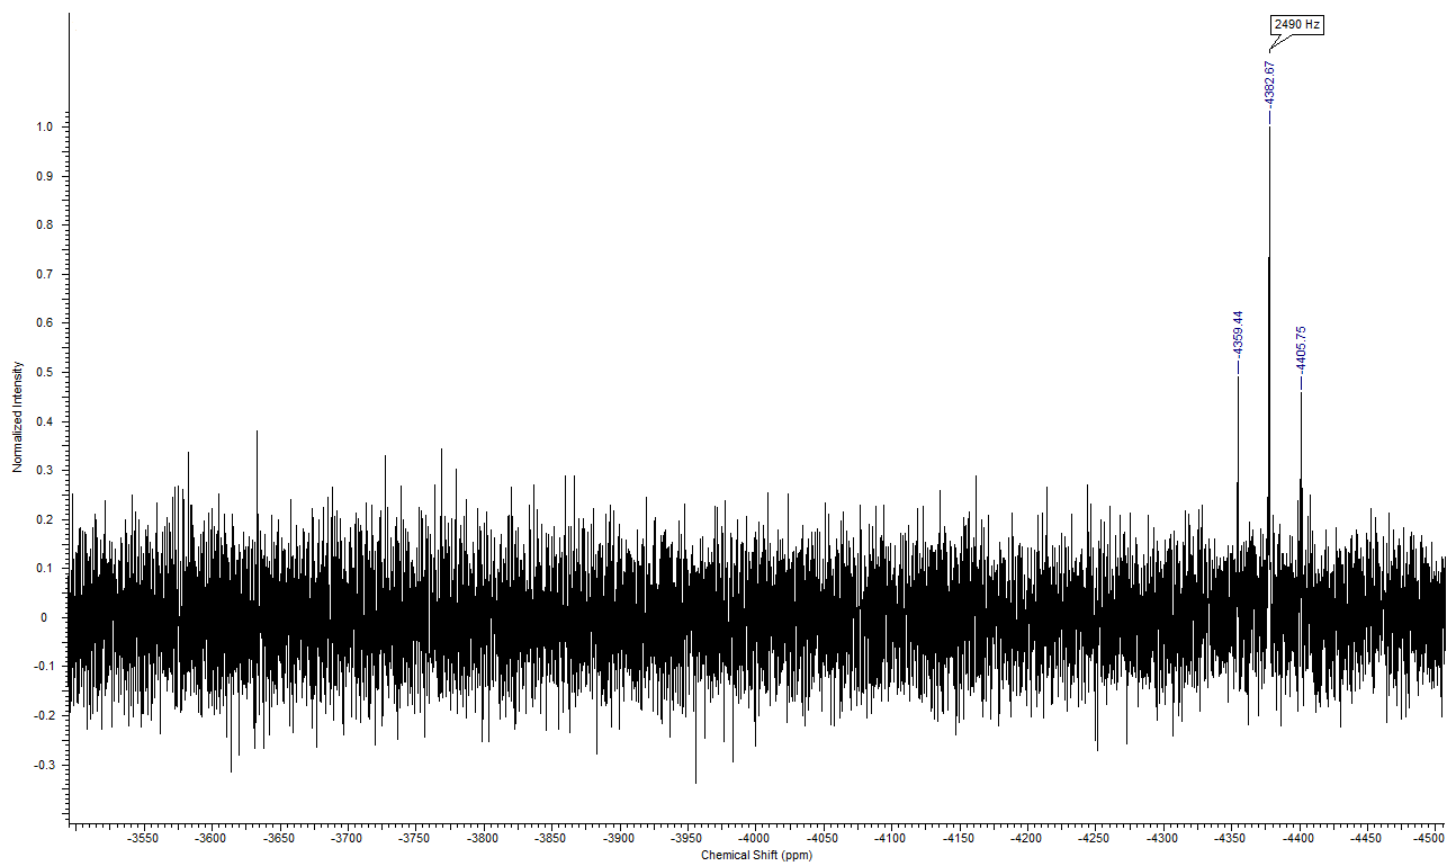

**Fig. S 35:**  $^{195}\text{Pt}$ -NMR spectrum (108 MHz,  $\text{CDCl}_3$ ) of complex **10b**.

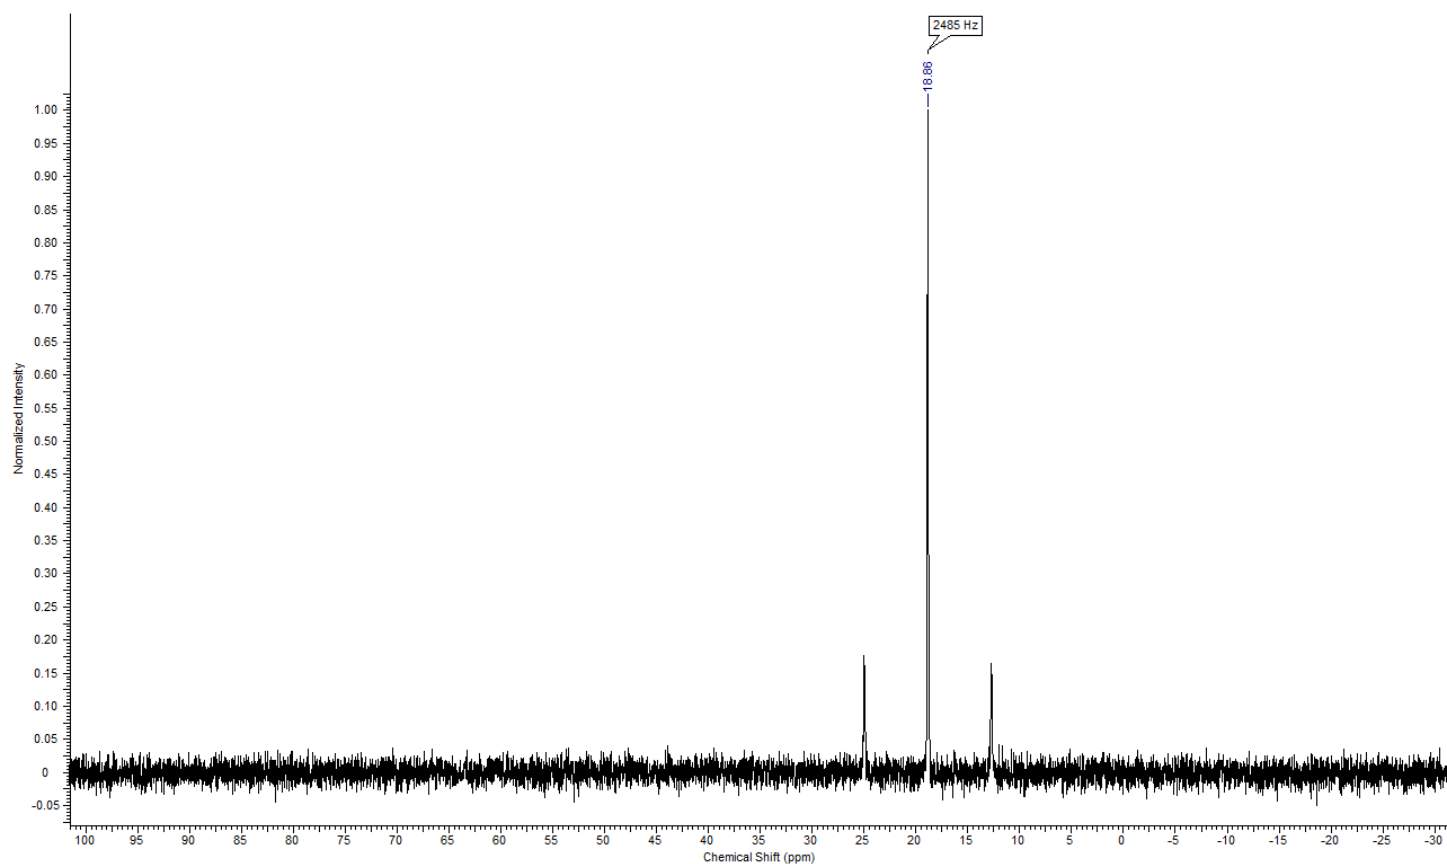

**Fig. S 36:**  $^{31}\text{P}$ -NMR spectrum (202 MHz,  $\text{CDCl}_3$ ) of complex **10b**.

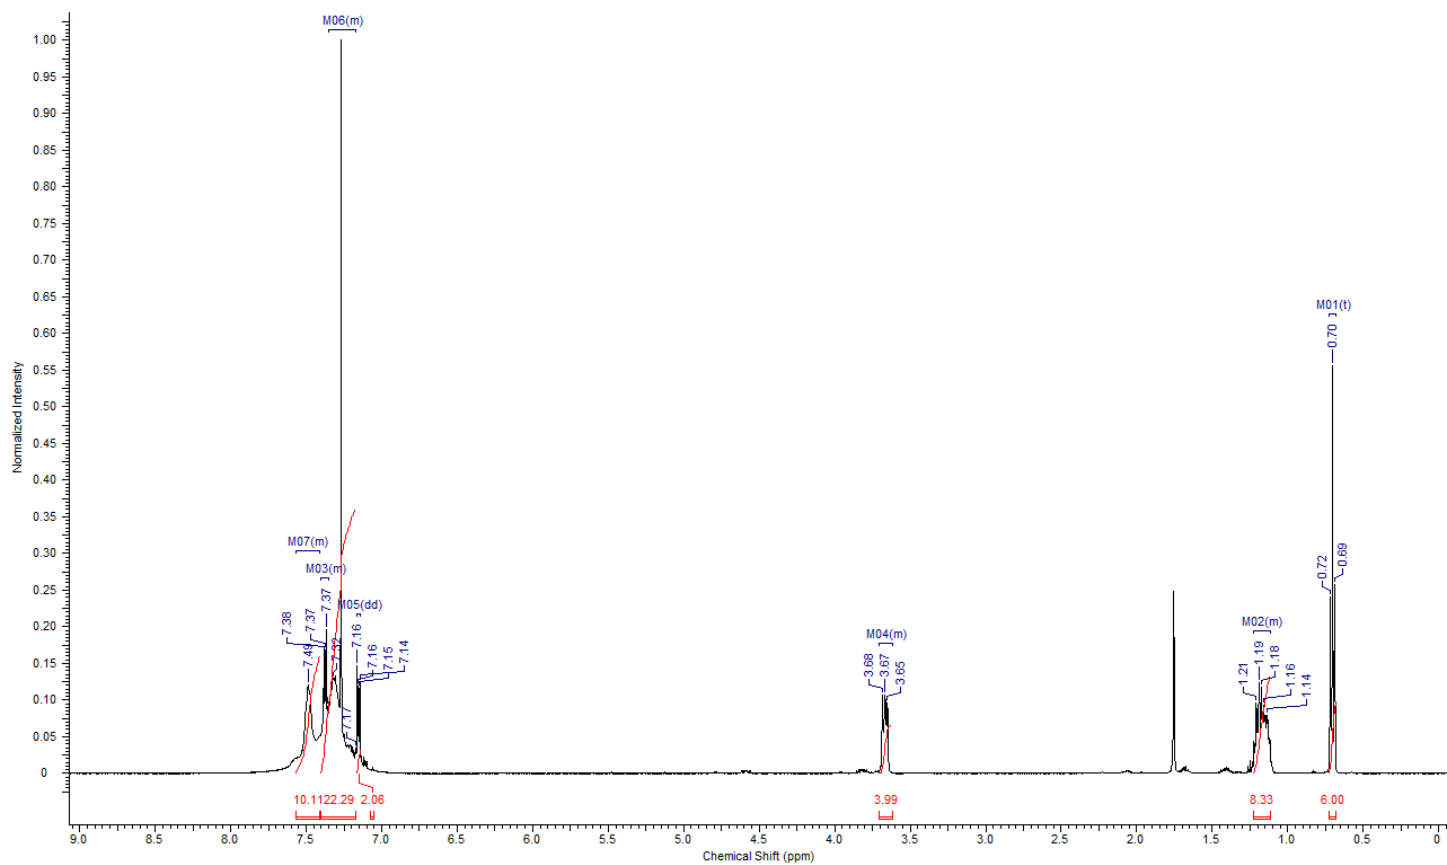

Fig. S 37:  $^1\text{H-NMR}$  spectrum (500 MHz,  $\text{CDCl}_3$ ) of complex **10c**.

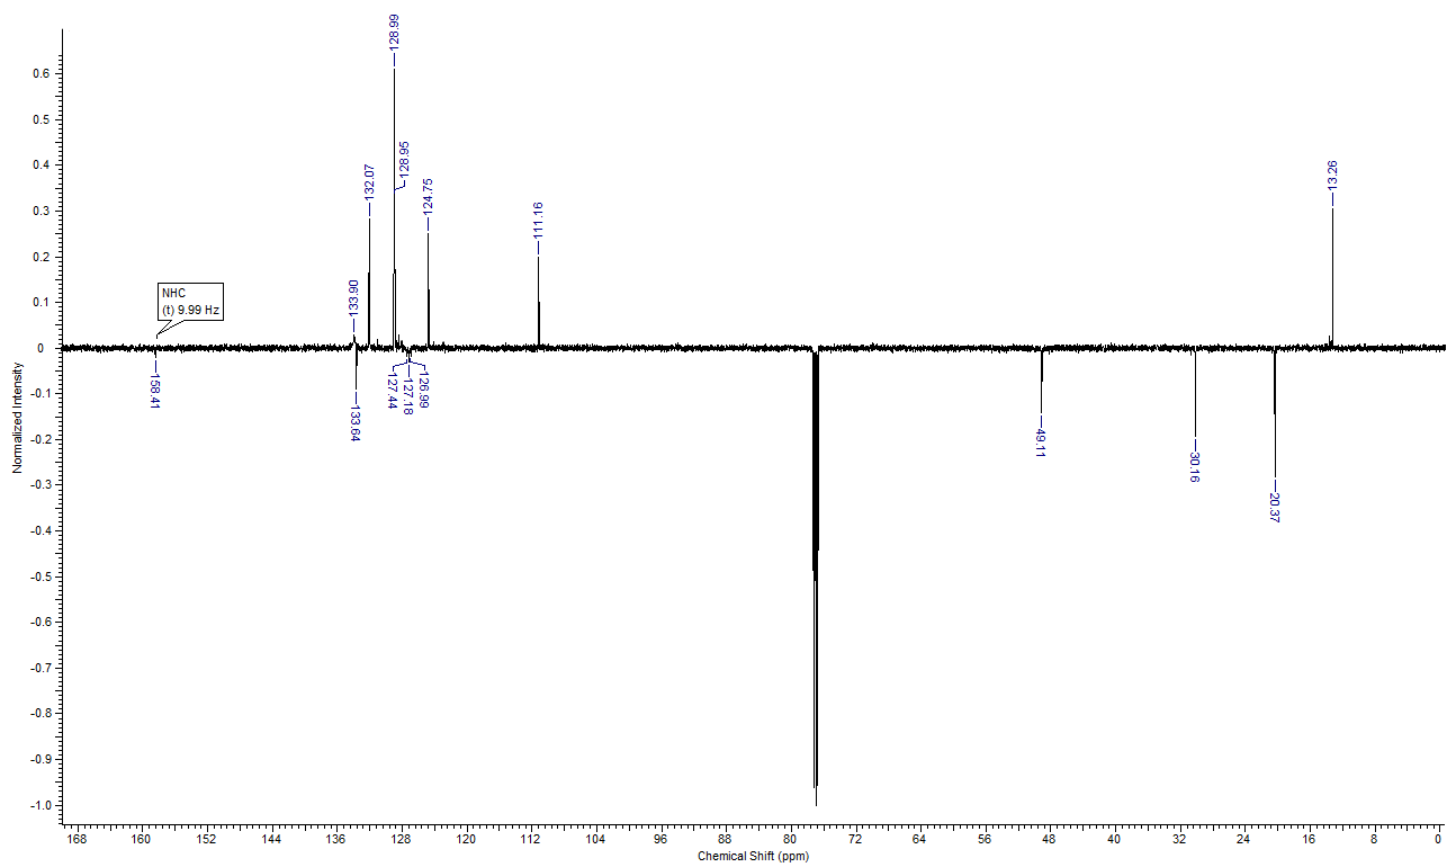

Fig. S 38:  $^{13}\text{C-NMR}$  spectrum (126 MHz,  $\text{CDCl}_3$ ) of complex **10c**.

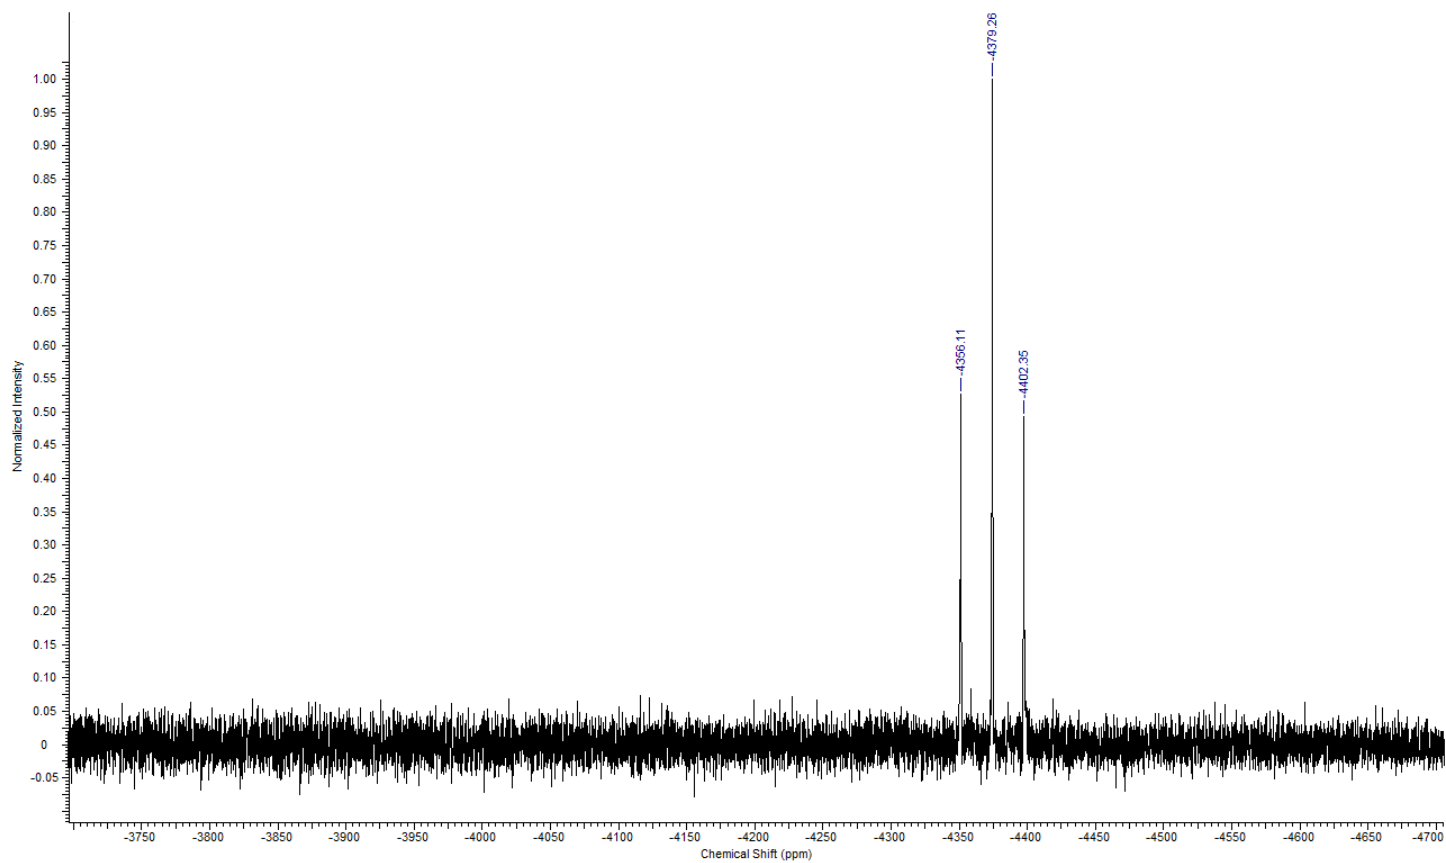

**Fig. S 39:**  $^{195}\text{Pt}$ -NMR spectrum (108 MHz,  $\text{CDCl}_3$ ) of complex **10c**.

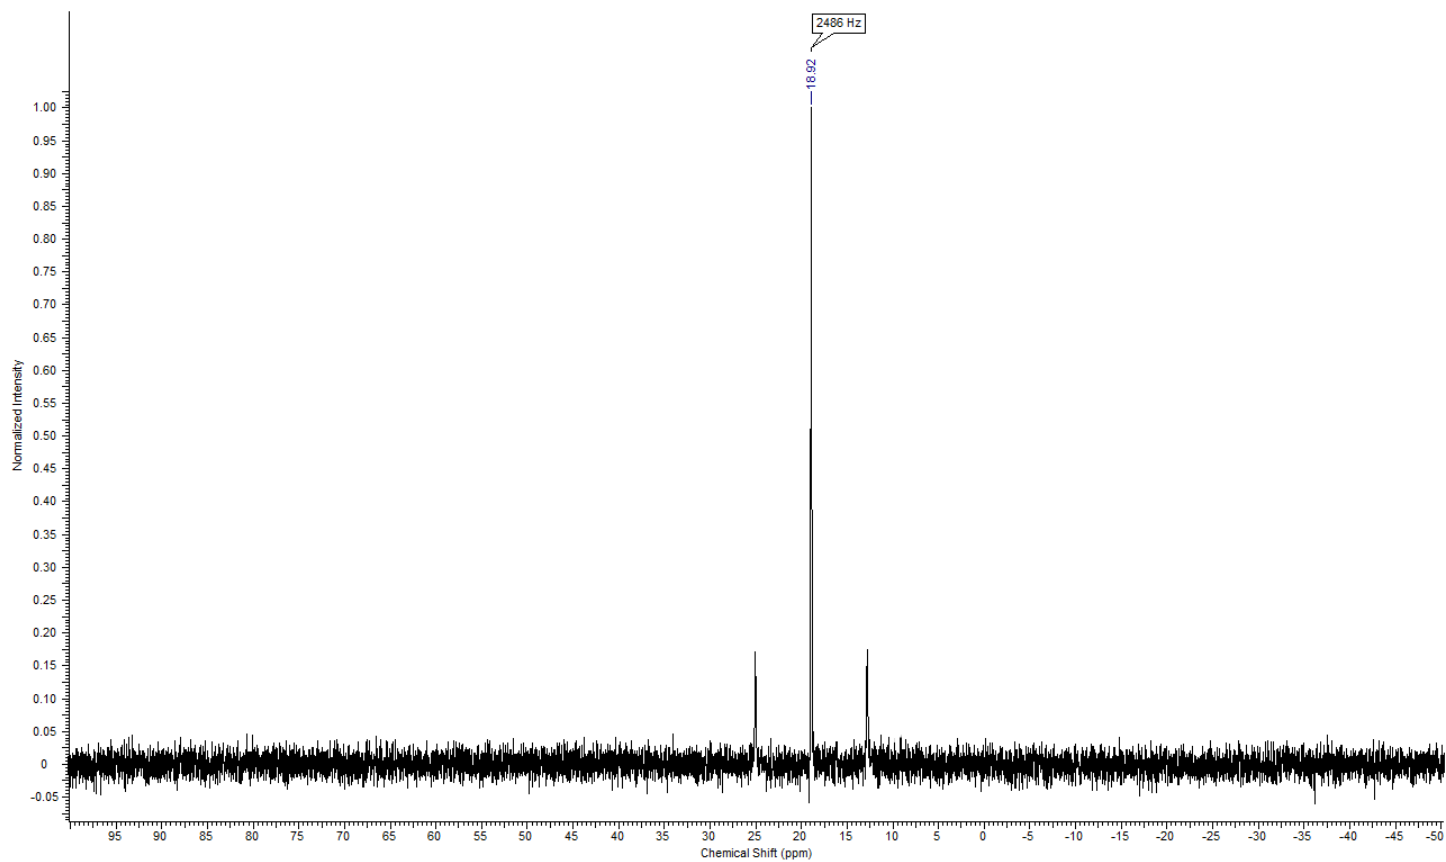

**Fig. S 40:**  $^{31}\text{P}$ -NMR spectrum (202 MHz,  $\text{CDCl}_3$ ) of complex **10c**.



**Table S 41.** Cellular accumulation of cisplatin and tested complexes in HCT116 cells.<sup>a</sup>

| Compound   | pmolPt/10 <sup>6</sup> cells |
|------------|------------------------------|
| CDDP       | 49 ± 3                       |
| <b>8a</b>  | 67 ± 5                       |
| <b>8b</b>  | 88 ± 12                      |
| <b>8c</b>  | 97 ± 2                       |
| <b>9a</b>  | 122 ± 21                     |
| <b>9b</b>  | 245 ± 18                     |
| <b>9c</b>  | 316 ± 22                     |
| <b>9d</b>  | 59 ± 4                       |
| <b>10a</b> | 520 ± 27                     |
| <b>10b</b> | 555 ± 21                     |
| <b>10c</b> | 592 ± 59                     |

<sup>a</sup>Cellular accumulation of Pt from tested compounds (8 μM in media) in HCT116 cells after 5 h of treatment. Each value in the table is in pmol Pt/10<sup>6</sup> cells. The results are expressed as the mean ± SD of three independent experiments.

**Table S 3.** Binding of **8c**, **9c**, **10a-c** to synthetic polydeoxyribonucleotides determined by FAAS.

|           | <b>8c</b> | <b>9c</b> | <b>10a</b> | <b>10b</b> | <b>10c</b> |
|-----------|-----------|-----------|------------|------------|------------|
| poly (dA) | 35%       | 40%       | 22%        | 20%        | 15%        |
| poly (dC) | 5%        | 3%        | 1%         | 1%         | 2%         |
| poly (dG) | 75%       | 82%       | 55%        | 52%        | 49%        |
| poly (dT) | 0.1%      | 0%        | 0.3%       | 0.1%       | 0.5%       |

Binding (%) was calculated as a ratio of Pt associated with the polydeoxyribonucleotides after dialysis to the total amount of Pt present in the sample, multiplied by 100.

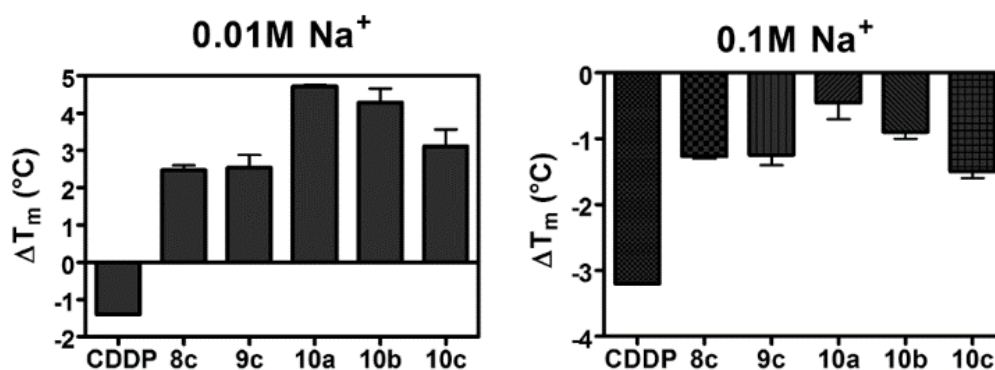

**Fig. S 41.**  $\Delta T_m$  values of ct DNA modified by **CDDP**, **8c**, **9c** and **10a-c** at  $r_b = 0.03$  measured in 0.01 M (left) or 0.1 M (right) NaClO<sub>4</sub> plus 1 mM Tris/Cl with 0.1 mM EDTA, pH 7.4.  $\Delta T_m$  is defined as the difference between the  $T_m$  values of platinated and nonmodified DNA. Data represent a mean ± SEM from two independent experiments.

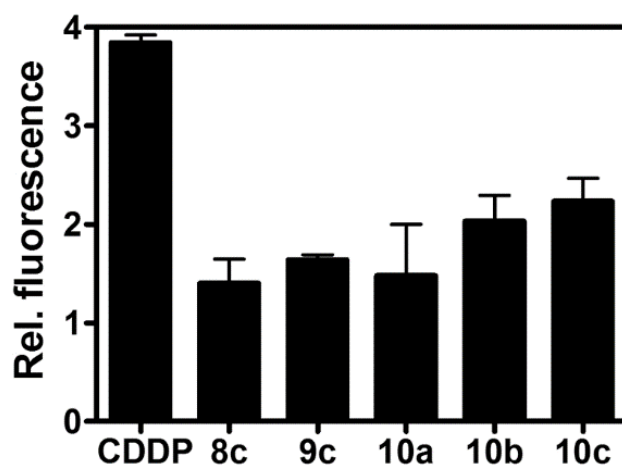

**Fig. S 42.** Changes in the relative fluorescence of  $Tb^{3+}$  ion bound to double-helical ctDNA modified by Pt complexes at  $r_b = 0.03$ .  $Tb^{3+}$  ion fluorescence of untreated DNA was arbitrarily set at 1. Values shown in the graph are the means ( $\pm$  SEM) of at least two independent measurements.

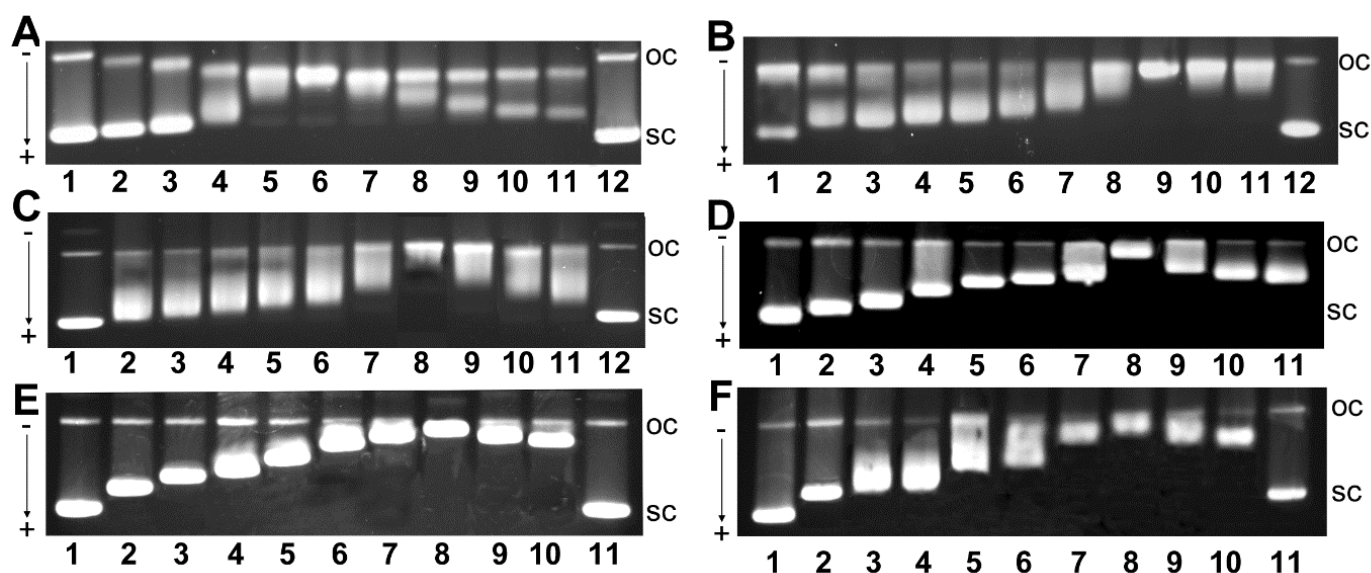

**Fig. S 43.** Unwinding of supercoiled pSP73 plasmid DNA by CDDP (A), **8c** (B), **9c** (C), **10a** (D), **10b** (E) and **10c** (F). The top bands correspond to the form of nicked plasmid (oc) and the bottom bands to the closed, negatively supercoiled plasmid (sc). A) lanes: 1 and 12, control, nonplatinated DNA; 2,  $r_b = 0.005$ ; 3,  $r_b = 0.01$ ; 4,  $r_b = 0.02$ ; 5,  $r_b = 0.03$ ; 6,  $r_b = 0.04$ ; 7,  $r_b = 0.05$ ; 8,  $r_b = 0.06$ ; 9,  $r_b = 0.07$ ; 10,  $r_b = 0.08$ ; 11,  $r_b = 0.09$ . B) lanes: 1 and 12, control, nonplatinated DNA; 2,  $r_b = 0.03$ ; 3,  $r_b = 0.04$ ; 4,  $r_b = 0.05$ ; 5,  $r_b = 0.056$ ; 6,  $r_b = 0.06$ ; 7,  $r_b = 0.07$ ; 8,  $r_b = 0.077$ ; 9,  $r_b = 0.084$ ; 10,  $r_b = 0.09$ ; 11,  $r_b = 0.1$ . C) lanes: 1 and 12, control, nonplatinated DNA; 2,  $r_b = 0.055$ ; 3,  $r_b = 0.06$ ; 4,  $r_b = 0.064$ ; 5,  $r_b = 0.07$ ; 6,  $r_b = 0.073$ ; 7,  $r_b = 0.078$ ; 8,  $r_b = 0.085$ ; 9,  $r_b = 0.09$ ; 10,  $r_b = 0.096$ ; 11,  $r_b = 0.1$ . D) lanes: 1 and 12, control, nonplatinated DNA; 2,  $r_b = 0.052$ ; 3,  $r_b = 0.06$ ; 4,  $r_b = 0.07$ ; 5,  $r_b = 0.074$ ; 6,  $r_b = 0.08$ ; 7,  $r_b = 0.085$ ; 8,  $r_b = 0.093$ ; 9,  $r_b = 0.1$ ; 10,  $r_b = 0.11$ ; 11,  $r_b = 0.12$ . E) lanes: 1 and 12, control, nonplatinated DNA; 2,  $r_b = 0.04$ ; 3,  $r_b = 0.05$ ; 4,  $r_b = 0.058$ ; 5,  $r_b = 0.065$ ; 6,  $r_b = 0.075$ ; 7,  $r_b = 0.08$ ; 8,  $r_b = 0.087$ ; 9,  $r_b = 0.091$ ; 10,  $r_b = 0.1$ ; 11,  $r_b = 0.11$ . F) lanes: 1 and 12, control, nonplatinated DNA; 2,  $r_b = 0.045$ ; 3,  $r_b = 0.052$ ; 4,  $r_b = 0.054$ ; 5,  $r_b = 0.06$ ; 6,  $r_b = 0.065$ ; 7,  $r_b = 0.07$ ; 8,  $r_b = 0.079$ ; 9,  $r_b = 0.085$ ; 10,  $r_b = 0.1$ ; 11,  $r_b = 0.11$ .

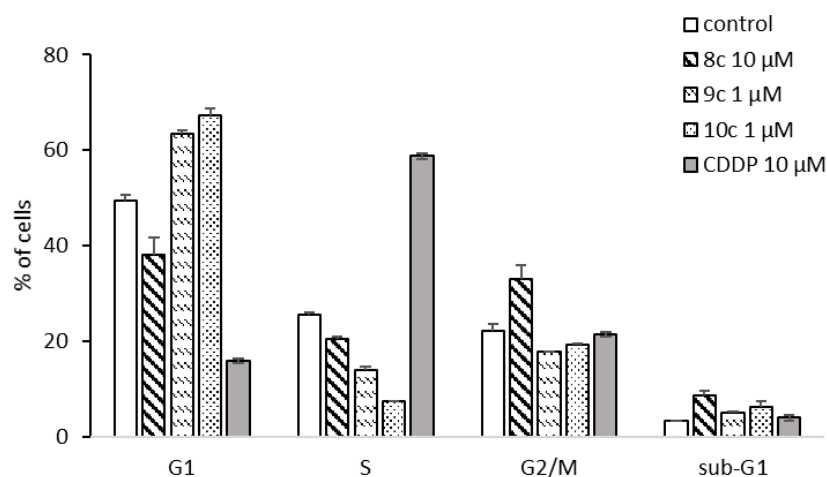

**Fig. S 44:** Effects of **8c** (10 μM), **9c** (1 μM), **10c** (1 μM), **CDDP** (10 μM) on the progression of the cell cycle of HCT116 p53<sup>-/-</sup> colon carcinoma cells after 24 h of treatment in comparison to untreated cells (vehicle control). The bars represent the percentages of cells in each phase of the cell cycle (G1, S and G2/M) and dead cells (sub-G1). Analysis was done via propidium iodide staining and flow cytometry, values represent means ± SDs of three experiments.

## References

- [1] R. Rubbiani, I. Ott *et al.*, *J. Med. Chem.*, 2010, **53**, 8608–8618, DOI: 10.1021/jm100801e.
- [2] H. Valdés, M. Poyatos, G. Ujaque, E. Peris, *Chem. Eur. J.*, 2015, **21**, 1578 – 1588, DOI: 10.1002/chem.201404618.
- [3] H. Lu and R. L. Brutchey, *Chem. Mater.*, 2017, **29**, 1396–1403, DOI: 10.1021/acs.chemmater.6b05293.
